# Supplementary material for: Holocene climate and oceanography of the coastal Western United States and California Current System
Source: Copernicus journal article supplement (doi:10.5194/cp-2021-109), 2021-09-03
Supplement: Supplementary file [file cp-2021-109-RC1-supplement.pdf]

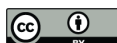

# Holocene climate and oceanography of the coastal Western United States and California Current System

Hannah M. Palmer<sup>1,2</sup>, Veronica Padilla Vriesman<sup>1</sup>, Caitlin M. Livsey<sup>1</sup>, Carina R. Fish<sup>1,2</sup>, Tessa M. Hill<sup>1,2</sup>

1. Earth and Planetary Sciences Department, University of California, Davis, Davis, California, 95616, United States of America
2. Bodega Marine Laboratory, University of California, Davis, Bodega Bay, California, 94923, United States of America

*Correspondence to:* Hannah M. Palmer (hmpalmer@ucdavis.edu)

## Abstract

To understand and contextualize modern climate change, we must improve our understanding of climatic and oceanographic changes in the Holocene (11.75 ka-present). Climate records of the Holocene can be utilized as a “baseline” from which to compare modern climate and can also provide insights into how environments and ecosystems experience and recover from environmental change. However, individual studies on Holocene climate in the literature tend to focus on a distinct geographic location, a specific proxy record, or a certain aspect of climate (e.g., upwelling or precipitation), resulting in localized, record-specific trends rather than a comprehensive view of climate variability through the Holocene. Here we synthesize the major oceanographic and terrestrial changes that have occurred in the Western United States (bounded by 30°N to 52°N and 115°W to 130°W) through the most recent 11.75 ka and explore the impacts of these changes on marine and terrestrial ecosystems and human populations. This three-tiered systematic review combines interpretations from over 100 published studies, codes and geospatially analyzes temperature, hydroclimate, and fire history from over 50 published studies, and interprets nine representative time series through the Holocene. We find that the early Holocene is characterized by warming relative to pre-Holocene conditions, including warm sea surface conditions, a warm and dry Pacific Northwest, a warm and wet Southwest, and overall spatial and temporal stability. In the mid Holocene, these patterns reverse; this interval is characterized by cool sea surface temperatures, a cool and wet Pacific Northwest and warm and dry Southwest. The late Holocene is the most variable interval, both spatially and temporally, and a novel spatial trend appears in terrestrial climate with warmer coastal areas and cooler inland areas. Human communities interacted with the environment throughout the entire Holocene, as evidenced in archeological and paleoenvironmental records, yet the recent era of colonization (1850-present) represents an unprecedented environmental interval in many records. Overall, our analysis shows linkages between terrestrial and oceanographic conditions, distinct environmental phases through time, and emphasizes the importance of local factors in controlling climate through the dynamic Holocene.



## 1 Introduction

### 1.1 Overview of Holocene Climate

40 In contrast to past intervals of glacial/interglacial variability, the Holocene has largely been regarded as a  
climatically stable interval. However, local and global changes in Holocene climate merit further investigation.  
Meta-analysis of global temperatures and patterns through the Holocene show a globally warm period from 11 to 5  
ka, termed the Holocene Climatic Optimum, largely driven by a concurrent peak in solar insolation in the Northern  
Hemisphere (Mayewski et al., 2004; Wanner et al., 2008; Renssen et al., 2012; Marcott et al., 2013; Bader et al.,  
45 2020). Following this period of global warmth, competing lines of evidence show divergent global temperature  
regimes in the last 5ka (some records show global warming and others global cooling); this phenomenon is termed  
the Holocene Conundrum (Wanner et al., 2008; Marcott et al., 2013; Liu et al., 2014; Marsicek et al., 2018; Bader et  
al., 2020). Currently available global reconstructions typically under-sample records from the North Pacific and  
Western North America, motivating the need for further analysis of Holocene change over time in this region  
50 (Marcott et al., 2013; Kaufman et al., 2020; Praetorius et al., 2020; Walczak et al., 2020).

General trends in global temperature are interrupted by multiple shifts of rapid climate change intervals between  
climate modes (marked changes in aridity and temperature) (Mayewski et al., 2004; Wanner et al., 2008). Holocene  
climate variability on various timescales has been attributed to multiple climate forcing mechanisms, including:  
55 changes in solar insolation, volcanic activity, land-use change, variations in atmospheric greenhouse gas  
concentrations, and resultant ocean-climate feedbacks (Crowley, 2000; Bradley, 2003; Atwood et al., 2016).  
Specifically, Northern Hemisphere solar insolation peaked at 9 ka and decreased towards the present with important  
implications for global and regional climate (Renssen et al., 2012; Marcott et al., 2013; Marsicek et al., 2018; Bader  
et al., 2020). Peak summer insolation in the early Holocene contributed to a warmer Arctic and continued melting of  
60 northern hemisphere ice sheets at this time (Renssen et al., 2012; Bader et al., 2020). Globally, episodes of high fire  
activity were relatively common in the early Holocene with a globally observed increase in fire activity between 3-2  
ka, likely due to a change in climate (Marlon et al., 2013).

In North America broadly, mean summer temperatures increased from the last glacial maximum (26-19 ka) (Clark et  
65 al., 2009; Waelbroeck et al., 2009) until between 6 and 3 ka by  $\sim 4^{\circ}\text{C}$  and subsequently decreased; variations are  
documented at 1100 year frequency (Viau et al., 2006). Across the continent, millennial-scale climate variability on  
the order of  $0.2^{\circ}\text{C}$  occurs across the entire Holocene (Viau et al., 2006). In the early Holocene, solar insolation and  
ice-sheet dynamics are dominant drivers of North American climate; following the collapse of the Laurentide Ice  
Sheet, the impact of ice sheet feedbacks on climate is reduced (Viau et al., 2006). Analysis of global and continental  
70 trends show a high degree of temporal and spatial climate variability highlighting the need to assess region-specific  
changes through time. Understanding regional Holocene variability is particularly relevant in order to contextualize  
biotic and environmental responses to anthropogenic climate change.

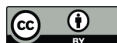

## 1.2 Modern climate and oceanography of Western North America

75 Western North America currently experiences impacts of drought, fire, fisheries and agricultural changes, heatwaves, and ecological shifts due to climate change (Ainsworth et al., 2011; Westerling et al., 2011; Mann and Gleick, 2015; Wise, 2016). Quantifying climatic and environmental changes over time in this region is of particular importance as it hosts a large modern human population, a multitude of natural resources, and highly biodiverse and productive ecosystems. By investigating climate and environmental change through the Holocene, we can better  
 80 understand how environments and ecosystems that are climatically and tectonically similar to present experience and recover from environmental change (Finnegan et al., 2015; Barnosky et al., 2017). We consider integrated physical processes, ecological responses, and human connections in this review and outline modern climate conditions below.

85 We divide the region into the Pacific Northwest (abbreviated as PNW; including the US states Washington, Oregon, and northern California) and Southwest (abbreviated as SW; including the US states Nevada, Arizona and central/southern California). The interaction between the Aleutian Low-pressure system, North Pacific High-pressure system, and Continental Thermal Low-pressure system drive temperature and hydrographic gradients (Fig. 1). Modern terrestrial climate of the Western United States varies latitudinally with cooler temperatures and  
 90 wintertime precipitation in the PNW and warmer temperatures, general aridity, and summer precipitation driven by the North American Monsoon (NAM) in the SW (Fig. 1) (Adams and Comrie, 1997; Barlow et al., 1998; Sheppard et al., 2002). Additionally, hydroclimate varies across topographic gradients from West to East with precipitation along the coast and increased aridity in the interior of coastal mountain ranges. Drought is a recurrent and salient feature of climate in the West, particularly in the context of anthropogenic climate change (Fig. 1) (e.g. Cook, 2004; Wise, 2016).

Wildfire is a dominant feature of the landscape of the Western United States with climate, vegetation, and human activity all contributing to fire activity (Westerling et al., 2003, 2011; Marlon et al., 2012; Higuera et al., 2021). In areas with sufficient vegetation productivity, high temperatures and drought are consistently linked with greater area  
 100 burned (Westerling et al., 2003; Marlon et al., 2012; Dennison et al., 2014). In grasslands and shrublands, fire is linked to both antecedent precipitation that drives fuel development and duration of summer and fall high temperatures. As high temperatures extend into spring and fall, the fire seasons coeval lengthen (Westerling et al., 2003; Marlon et al., 2012; Dennison et al., 2014). As such, the investigation of changes in the fire regime within the paleorecord is useful in identifying the relative importance of temperature, precipitation, vegetation, and human  
 105 activity on wildfire.

Marine and terrestrial climates are linked in this region; Westerly winds influenced by North Pacific ocean-atmosphere dynamics result in high correlation between North Pacific sea surface temperatures (SST) and coastal air temperatures and hydrography (LaDochy et al., 2007; Barron and Anderson, 2011). The westerly winds generated  
 110 by the Aleutian Low pressure system and North Pacific High pressure system fuel the California Current System

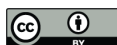

(CCS), which flows southward from ~50° N to ~15°N (Fig. 1) (Hickey, 1979; Checkley and Barth, 2009). The CCS is characterized by strong seasonal wind-driven upwelling that drives high surface productivity along Western North America (Hickey, 1979; Checkley and Barth, 2009; Siedlecki et al., 2015). Respiration, remineralization, and decomposition lead to high organic carbon export and oxygen-depleted (CO<sub>2</sub>-rich) bottom waters (Chelton et al., 115 1982; Checkley and Barth, 2009; Siedlecki et al., 2015). The interaction of the equatorward California Current, the poleward Davidson Current, and the sub-surface, poleward California Undercurrent drive oceanographic conditions south of Point Conception (Bray et al., 1999). Seasonal, annual, and decadal events, including the Pacific Decadal Oscillation (PDO), North Pacific Gyre Oscillation, and El Niño Southern Oscillation (ENSO) play a significant role in driving Eastern North Pacific SST and productivity across multiple timescales (Lluch-Cota et al., 2001; 120 Batchelder and Powell, 2002; Mantua et al., 2002; Chavez et al., 2003; Di Lorenzo et al., 2008). Changes to climate and oceanographic conditions have important implications for ecological systems. Changes in marine currents, upwelling regime, and temperature impact primary production, with cascading implications for the entire marine food web (Barron et al., 2003b; Yati et al., 2020). In terrestrial systems, variability in precipitation, air temperature, and fire regime exert strong control over plant and animal communities (Marlon et al., 2006; Beaty and Taylor, 125 2009; Clark et al., 2012; Kirby et al., 2015; Shuman et al., 2018).

Climate and environmental change through time impact human communities that have been present in Western North America throughout the Holocene. Evidence from over 40 archeological sites in North America shows humans were likely present before, during, and after the Last Glacial Maximum (26.5-19 ka) (Becerra-Valdivia and 130 Higham, 2020). Additional evidence for human presence and societal expansion within the geographic (Washington through Baja California) and temporal (Holocene) range of this review includes archaeological evidence from shell middens as well as Indigenous oral histories (Erlandson et al., 2007, 2009; Kennett et al., 2007; Rick, 2011; Braje et al., 2012; McKechnie, 2015; Becerra-Valdivia and Higham, 2020). Previous work has investigated linkages between climate and human communities on a local scale through the Holocene (Erlandson et al., 2007; Kennett et al., 2007; 135 Rick, 2011; Braje et al., 2012; Glassow et al., 2012; McKechnie, 2015); these relationships will be further explored in this review.

Here, we summarize and synthesize over 100 published records of both marine and terrestrial systems from the Western US and California Current System (See Appendices A-C), resulting in the most comprehensive multi-proxy 140 Holocene climate reconstruction for this region to date. This systematic review addresses the following linked research questions: What are the major patterns and climatic phases during the Holocene for the Western United States? How do marine and terrestrial environments interact in this region during the Holocene? How do climate and oceanographic changes impact ecological and human communities in the Holocene?

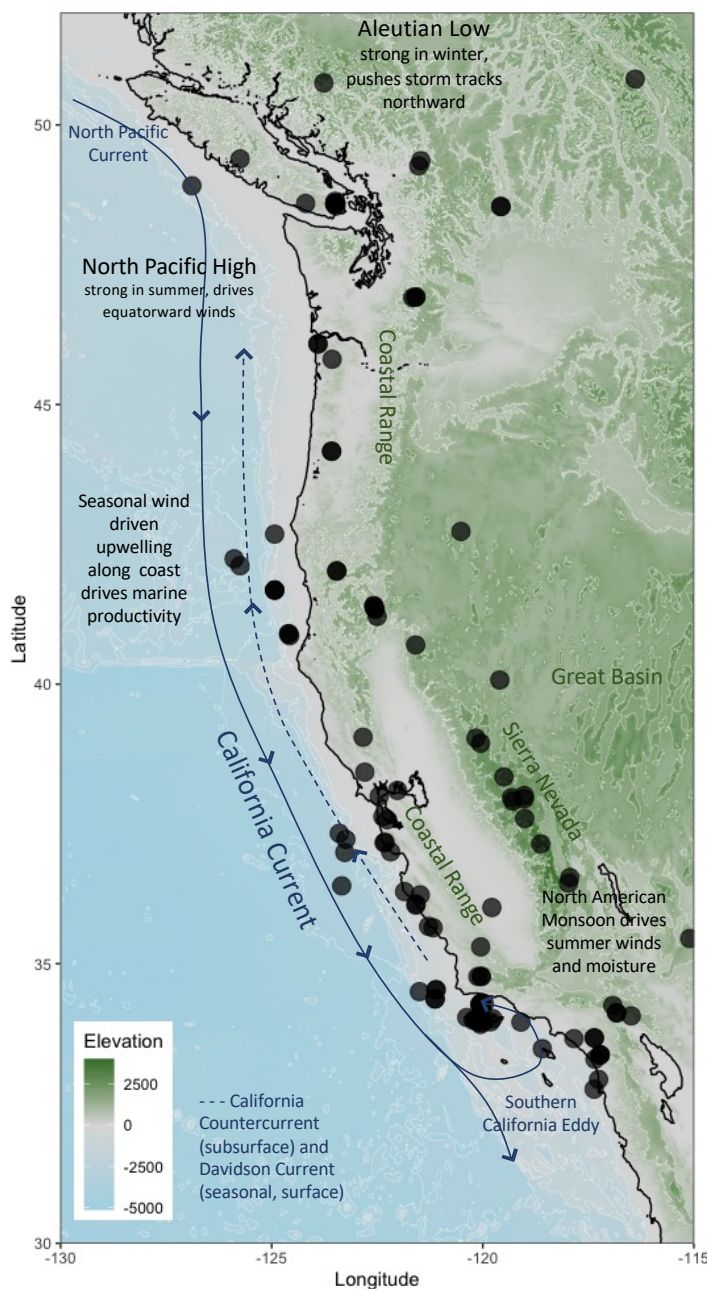

145 **Figure 1:** Map of locations of all studies reviewed in the paper with simplified schematic of modern oceanographic and hydrographic conditions.



## 2 Methodology

150 For the purposes of this paper we follow the standard convention formally recognized by the International  
 Commission on Stratigraphy (Walker et al., 2018); early Holocene (Greenlandian, 11.75-8.2 ka), mid Holocene  
 (Northgrippian, 8.2-4.2 ka), and late Holocene (Meghalayan, 4.2-0 ka). We do include interpretations that span  
 across these sub-epoch time intervals. We constrain our study to the geographic region bounded by 30°N to 52°N  
 and 115°W to 130°W as this region has an abundance and variety of long-term records and well-documented  
 155 human-environment interactions through the Holocene.

A multi-step systematic review was conducted to select previous studies for inclusion in this review. In the first step,  
 we identified studies that met the following criteria: records from Western North America and the CCS and that  
 represented Holocene aged reconstructions. Records were initially found using the following topics as search terms:  
 160 marine temperature, ocean circulation, marine productivity, terrestrial hydroclimate, drought, floods, terrestrial  
 temperature, fire, archaeology, marine ecology, and terrestrial ecology. Each paper was then evaluated with a second  
 set of criteria for inclusion in the paper. Records with a published age model and scope of the study within the  
 defined geographic region (30°N to 52°N and 115°W to 130°W) were selected for inclusion.

165 A total of 101 papers matched these criteria and were categorized as providing constraints on: marine temperature,  
 circulation, and productivity; terrestrial hydroclimate; terrestrial temperature and fire; archaeology, marine ecology,  
 and terrestrial ecology. A wide range of archive types are represented here: archaeology (8 papers),  
 dendrochronology (2), speleothem (3), lacustrine sediments (36), marine sediments (31), and other records including  
 geomorphology, animal midden, and lichen archives (7). This paper makes no attempt to evaluate the effectiveness  
 170 of each proxy or to re-examine the primary data; rather, interpretations of data from original work are maintained.  
 Interpretations in original papers are based on a variety of well-established proxies: alkenones (2 papers), carbon and  
 nitrogen isotopes of bulk sediments (3), charcoal (14), diatom and silicoflagellate assemblage (7), foraminiferal  
 assemblage (9), geomorphology (3), hydrogen isotopes from leaf wax (4), oxygen and carbon isotopes of nearshore  
 marine organisms (7), oxygen and carbon isotopes of biogenic and non-biogenic calcite (marine and terrestrial, 10),  
 175 macrofossil abundance (6), pollen assemblage (25), radiocarbon dating (as a proxy, not only for age model  
 development 3), sedimentology, including grain size analysis, lithology, organic content, carbon content analysis  
 (29), and tree ring/tree stump analysis (4).

In the second step of the systematic review process, we identified papers that met a second set of criteria, coded  
 180 results through time, and conducted a spatial and temporal analysis of the synthesis. This criteria included all studies  
 at least 3000 years of the Holocene, and in which the authors must have identified and described a clear climatic  
 pattern or patterns for an entire Holocene interval. Results from each paper were binned into time intervals: early,  
 mid, and late Holocene, and coded using the following categories: hydroclimate (wet or dry), temperature (warm or  
 cold), and fire activity (high or low). Results were coded using keywords from the original authors' description of  
 185 climate conditions at each point in time: temperature keywords: warm, cold, cool; hydroclimate keywords: wet, dry,





moisture, arid(ity), pluvial, fluvial, precipitation; fire keywords: high, low, activity, frequency, return interval, intensity. We generated a database that contains paper (author, date), latitude, longitude (of all sites within each paper), region (PNW or SW), archive type, and coded results for each category (hydroclimate, temperature, fire activity) in each interval (early, mid, late). Primary data were not reevaluated; rather, interpretations of data from original work are maintained. For example, changes in SST may be inferred from alkenones, foraminiferal assemblages, or foraminiferal isotope records in previously published studies, but all are represented as temperature in the coded database. We utilize the term “fire activity” to be inclusive of multiple paleofire proxy types including fire return intervals, CHAR, charcoal accumulation, and others. Some papers contributed multiple data points to this step, for example, some records included interpretations of multiple processes (e.g., temperature and hydroclimate) and some include interpretations across multiple time intervals (early, mid, late). Yet, papers that only included one interpretation in one interval are also included. For the papers analyzed here, the SW (30° - 40° N, 32 papers) is more data rich than the PNW (40° - 47°N, 17 papers) and data are fairly well distributed across all three time periods (Figs. 2,3). Results of coded analysis are plotted in space through the three time intervals (early, mid, late Holocene) (Figs. 2,3). Base maps with elevation are generated using the R package marmap (Pante and Simon-Bouhet, 2013) accessing bathymetric and elevation data from the NOAA ETOPO1 global relief model (Amante and Eakins, 2009).

Following the spatial and temporal analysis, we highlight a subset of regionally representative time series records from the PNW (Fig. 4) and SW (Fig. 5). We prioritized records with high temporal resolution, continuous records, and records that span at least two intervals of the Holocene (Kaufman et al., 2020). Further, we selected records that represent temperature, hydroclimate, and fire activity for each region (PNW and SW). For these purposes, data was accessed through original papers, supplemental information, or through the NOAA Paleoclimate Database (Appendix D).

## 3 Results and discussion

### 3.1 Early Holocene (11.75-8.2 ka)

Thirty-seven papers encompassing 60 sites fit the criteria for inclusion in the spatial analysis. Archives included lake sediments (17 papers), marine sediments (15 papers), and three others (archaeological, geomorphology, speleothem) (Appendix B, C).

#### 3.1.1 Regional Synthesis

Spatial analysis of coded hydroclimate, temperature, and fire history indicate that the early Holocene was generally characterized by a dry and warm PNW and a wet and warm SW (Fig. 2). These trends are also observed in time series data from both regions (Figs. 4, 5). In the PNW, sea surface temperatures were warm, winters were dry, and fire activity was high (Fig. 4). In the SW, sea surface temperatures were warm, terrestrial temperatures were cold, fire activity was low, and hydroclimate was generally wet (Fig. 5).

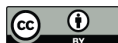

Generalized warming in the early Holocene relative to pre-Holocene conditions follows two abrupt Northern hemisphere climate transitions, characterized by rapid warming during the Bølling–Allerød (14.7–12.9 ka) and rapid cooling associated with the Younger Dryas (12.9–11.7 ka) (Barron et al., 2003b; McGann, 2015). Sea surface temperatures were warm across the entire coastal CCS during the early Holocene (Fig. 2), likely driven by high summer insolation (insolation maximum at 9 ka) and warming following deglaciation. Despite warm SST across the region, terrestrial hydroclimate and temperatures varied latitudinally, indicating regional differences in marine-terrestrial climate linkages and impacts of the insolation maximum (Fig. 3). In the PNW, warm SSTs co-occurred with warm and dry terrestrial conditions (Heusser, 1998; Barron et al., 2003b; Steinman et al., 2016), while in the SW, wet conditions were driven by the evolution of the North American Monsoon (NAM) and the resultant increase in summertime precipitation in the early Holocene relative to pre-Holocene (Fig. 2) (Bird and Kirby, 2006; Kirby et al., 2015; Metcalfe, 2015).

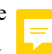



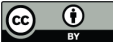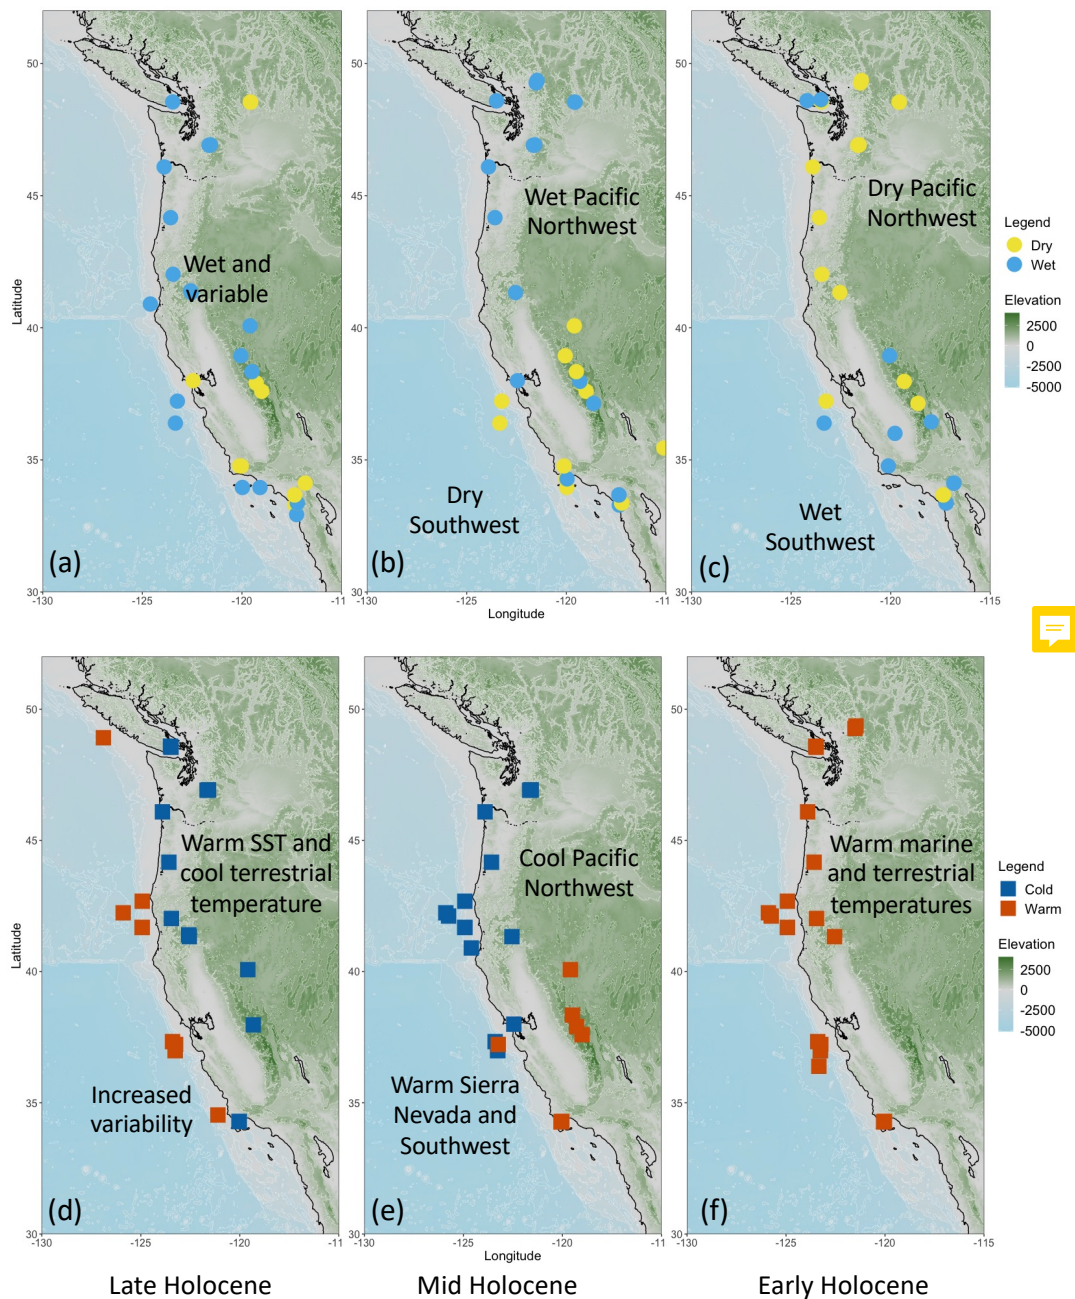

235 **Figure 2:** Top panel shows hydroclimate records in early (11.7 - 8.2 ka, (c)), mid (8.2 - 4.2 ka, (b)), and late (4.2 - 0 ka, (a)) Holocene: yellow dots represent dry and light blue represents wet. Bottom panel shows temperature records from early (f), mid (e), and late (d) Holocene: dark blue squares represent cold temperatures and orange represents warm temperatures.



### 240 3.1.2 Terrestrial climate

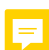

In the PNW, multiple records show warm and dry conditions in the early Holocene (Figs. 2c, 2f) (Mohr et al., 2000; Hallett et al., 2003; Briles et al., 2005; Malamud-Roam et al., 2006; Marlon et al., 2006; Gavin et al., 2007; Long et al., 2011; Steinman et al., 2019). Drier than modern conditions existed in locations dominated by winter precipitation (largely PNW) (Fig. 2c) (McGann, 2011; Hermann et al., 2018). An East-West precipitation gradient was established with warm and drier conditions in the East and wet conditions in the West (Brown and Hebda, 2002), fire activity was high at multiple locations (Hallett et al., 2003; Marlon et al., 2006; Gavin et al., 2007; Steinman et al., 2019), and the amount of biomass burning and the extent of tree cover increased during this time (Figs. 2, 3) (Marlon et al., 2006; Gavin et al., 2007). The early Holocene increase in fire activity in the PNW relative to pre-Holocene conditions may have been caused by warmer/drier conditions resulting from amplified seasonality due to increased insolation relative to pre-Holocene (Walsh et al., 2017; Steinman et al., 2019). In some locations (i.e., Scanlon and Castor Lake), fire frequency increased relative to glacial, but remained lower relative to the mid or late Holocene (Walsh et al., 2017). Few records show wet conditions in the PNW during the early Holocene (McQuoid and Hobson, 2001).

255 In California's Central Valley and Sierra Nevada, the early Holocene was wet with low or variable fire frequency (Figs. 2, 3) (Benson et al., 2002; Bacon et al., 2006; Negrini et al., 2006; Hallett and Anderson, 2010). Fuel abundance exerted a stronger control on fire than regional climate (Hallett and Anderson, 2010). In the Eastern Sierra Nevada (i.e., Lower Gaylor Lake and Barrett Lake near Mono Lake), low biomass (sparse pine dominated forests and chaparral shrubs) reinforced by low snowpack persistence due to the insolation maximum, led to low fire frequency (Hallett and Anderson, 2010). In the Lake Tahoe Basin, precipitation was high in the early Holocene and fire frequency was low in the very early Holocene (11-9 ka) and transitioned to higher fire frequency than modern from 9 ka through mid Holocene (Lindstrom, 1990; Benson et al., 2002; Beaty and Taylor, 2009).

In comparison to the arid PNW, early Holocene conditions in the SW were largely wetter than modern (Fig. 2).  
 265 Lacustrine records from across the SW show heavy precipitation in the early Holocene (Bird and Kirby, 2006; Kirby et al., 2007, 2010, 2012, 2014, 2015; Bird et al., 2010; Du et al., 2018). Wet conditions at this time were driven by the development of the NAM (Bird and Kirby, 2006; Kirby et al., 2007; Marcott et al., 2013; Hermann et al., 2018). The enhancement of the NAM is attributed to warm SSTs in the Gulf of California and to the early Holocene winter insolation minimum and summer insolation maximum leading to an increased frequency of both winter storms and of tropical cyclones making landfall in southern California (Bird and Kirby, 2006; Kirby et al., 2007; Marcott et al., 2013; Hermann et al., 2018). A pluvial episode was synchronous across multiple sites in southern California from 9.1 to 8.25 ka and may have been driven by atmospheric river-like winter storms (Kirby et al., 2012). High moisture/precipitation is shown in both inland (desert) and coastal sites, including increased runoff into the Santa Barbara Basin from 9 to 8.5 ka (Kirby et al., 2007, 2010, 2012, 2014; Du et al., 2018). In contrast, lake sediment records from southern California that resolve summer evaporation show high evaporation and multiple intervals of



drought in the early Holocene; high winter precipitation and high summer evaporation may explain the differences between multiple records in this region (Kirby et al., 2019).

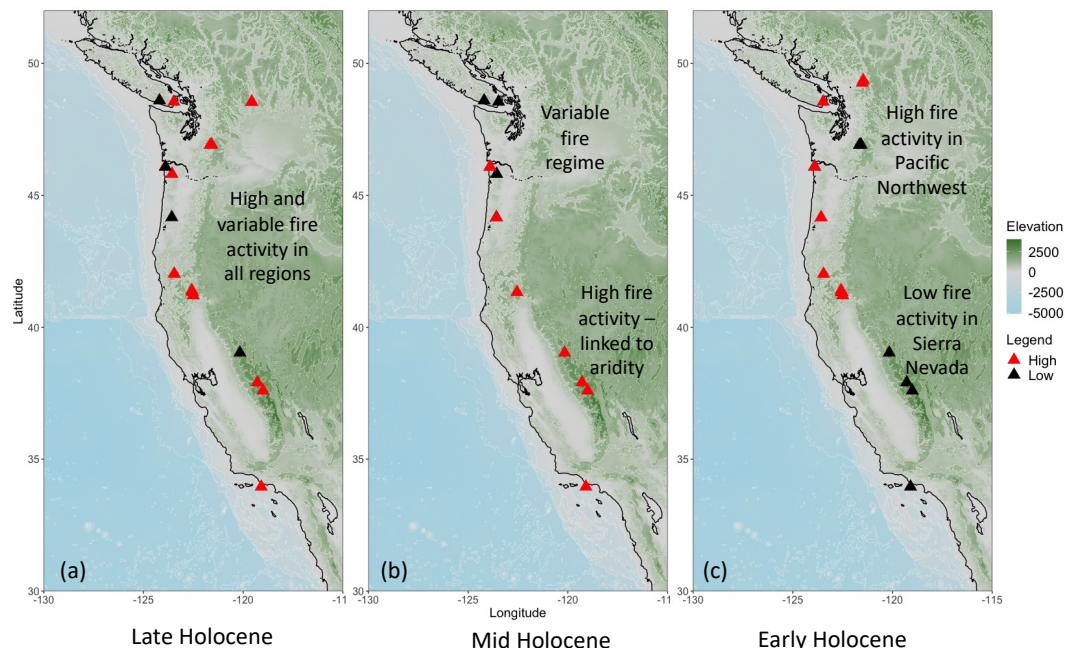

**Figure 3:** Fire activity as reconstructed by charcoal records through the early (11.7 - 8.2 ka, (c)), mid (8.2 - 4.2 ka, (b)), and late (4.2 - 0 ka, (a)) Holocene; red indicates high fire activity, green indicates low fire activity. Multiple metrics for fire activity are used; interpretations of original authors are preserved.

### 3.1.3 Marine conditions

Offshore of southern Oregon through Central California, the early Holocene was characterized by warm SSTs resulting from subtropical waters transported by currents comparable to the modern-day Davidson Current (Figs. 1, 2) (Mix et al., 1999; Barron et al., 2003b; Barron and Bukry, 2007a). In this area, the oceanographic regime was characterized by overall warm conditions, moderate to high export productivity, ventilation of deeper waters, and the development of the oxygen minimum zone (Barron et al., 2003b; McGann, 2011; Addison et al., 2017). During this time, the California Current was weaker than present allowing a strong northward Davidson-like current (Barron and Bukry, 2007a). Though upwelling was weaker than modern in the early Holocene, records from offshore Oregon show moderate marine productivity and multiple records indicate an increase in coastal upwelling beginning at 9 ka (Gardner et al., 1988; Barron et al., 2003b; Addison et al., 2017; Barron et al., 2017).

Offshore southern California (in Santa Barbara Basin), high productivity and overall warm SSTs occurred during the early Holocene (Kennett et al., 2007; Fislér and Hendy, 2008). Records extending from northern California south to the Baja California (Sur) peninsula indicate that in many locations, the onset of poorly oxygenated conditions in



subsurface and intermediate waters occurred in the early Holocene, indicating changes in surface water productivity, intermediate water ventilation, or both relative to pre-Holocene conditions (Kennett and Ingram, 1995; Mix et al., 1999; Roark et al., 2003; van Geen et al., 2006; Moffitt et al., 2014). Changes in the strength or source of North Pacific Intermediate Water and the incursion of lower oxygen intermediate waters in Santa Barbara Basin (SBB) are also indicated (Roark et al., 2003; Moffitt et al., 2014).

### 3.1.4 8.2 ka Event

The end of the early Holocene is marked by a large-scale Northern Hemisphere cooling event initiated by an abrupt drainage of Lake Agassiz into the North Atlantic that weakened Atlantic Meridional Overturning Circulation, and is well documented in many records (Thomas et al., 2007; Matero et al., 2017; Estrella-Martínez et al., 2019; Voarintsoa et al., 2019). Although this is a globally well described event, relatively few records (fewer than 10 records reviewed in this paper) from the Northeastern Pacific and Western United States record impacts of this event. In central California (White Moon Cave), speleothem records show increased effective moisture at 8.2 ka which is attributed to intensification of the Pacific storm track that is synchronous on Eastern and Western sides of the Pacific (Oster et al., 2017). A lake record from Dry Lake in the SW (San Bernardino Mountains) shows a cooler, dryer and enhanced erosional period during the 8.2 ka event (Bird and Kirby, 2006). Marine records from off the coast of northern California (near the California-Oregon border) show a cold event at 8.2 ka, but this is not noted in other nearby marine records (Barron et al., 2003b). We hypothesize that the 8.2 ka event has a limited impact in this region, apart from the teleconnected impact of changes to the Pacific storm track impacting local hydroclimate.

### 3.1.5 Ecological responses to change

In the early Holocene, terrestrial plant communities generally indicate warm conditions, but show a process of succession out of glacial-associated ecosystems (Heusser, 1998). In the PNW, expansion of alder (*Alnus*) and ferns (*Pteridium*) began at the start of the Holocene, and Douglas fir (*Pseudotsuga menziesii*), western hemlock, grasses (*Poaceae*), and bracken fern (*Pteridium*) forests emerged by the end of the interval (Heusser, 1983; Pellatt et al., 2001). Southern Oregon cave records demonstrate taxonomic stability in plant communities through the early Holocene with communities dominated by pine (*Pinus*) and sagebrushes (*Amaranthaceae*, *Artemisia*) (Beck et al., 2018). In the Klamath mountains, pine and oak (*Quercus*) dominated the pollen record during the warm dry early Holocene; similarly, pine, oak, and juniper dominated the record in the Siskiyou Mountains (Mohr et al., 2000; Briles et al., 2005). In northern California, pollen assemblages indicate warm winters, including an expansion of coastal redwoods, and declining alder (*Alnus*) forests (Barron et al., 2003b; Lyle et al., 2012). The increasing upwelling during the Holocene led to enhanced coastal fog and as a result, increasing dominance of coastal redwood (*Sequoia sempervirens*) (Gardner et al., 1988; Barron et al., 2003b; McGann, 2015; Addison et al., 2017). In Central California, increases in redwoods, oaks, *Nepenthes densiflora*, and *Asteraceae* indicate warmer and wetter conditions relative to glacial (McGann, 2015). In southern California, the early Holocene maintained a forest ecosystem distinct from the modern with more pines and conifers than in the late Holocene and modern (Heusser, 1978).





335 In marine systems off the coast of northern California (Farallon Escarpment and offshore of the Russian River)  
 transitions in planktic and benthic fauna occurred during the early Holocene as environmental conditions transition  
 out of the glacial (Gardner et al., 1988; McGann, 2011). From 11.75 to 10 ka marine sediment records show low  
 abundance of the upwelling-associated diatoms *Thalassionema nitzschioides* and *Thalassionema longissimi*, and the  
 dominance of a cool, subpolar foraminiferal assemblage (Gardner et al., 1988). By 10.5-9 ka, carbonate productivity  
 340 and total carbon peaked and warm water morphotypes of foraminifera were dominant across two northern California  
 marine sediment records during this spike in productivity (Gardner et al., 1988; McGann, 2011). In coastal systems,  
 kelp forests were present along the entire coastline from the SW to the PNW and increased in both size and range  
 during the early Holocene (Erlandson et al., 2007; Graham et al., 2010). In deeper waters, the gradual development  
 of the oxygen minimum zone in the early Holocene led to a transformation of seafloor ecosystems to a low oxygen-  
 345 adapted assemblage (Cannariato and Kennett, 1999; Moffitt et al., 2014). Off the coast of Point Conception, seafloor  
 fauna (e.g., benthic foraminifera) were variable in the early Holocene, with the establishment of the modern fauna  
 by 9ka (McGann, 2015). In Northern (Farallon Escarpment) and southern California (SBB), low oxygen conditions  
 developed during the early Holocene and caused a shift in benthic fauna during this interval (Cannariato and  
 Kennett, 1999; McGann, 2015).

350

### 3.1.6 Human-environment interactions

Evidence for human presence and settlement along the North American Pacific coast throughout the Holocene is  
 well documented in Indigenous ethno-history and archaeological records, yet these records are geographically  
 disparate (Erlandson et al., 2007; McKechnie, 2015; Edinborough et al., 2017). In the PNW, archeological evidence  
 355 for human presence is documented prior to the start of the Holocene (Kaufman et al., 2016; Beck et al., 2018;  
 Becerra-Valdivia and Higham, 2020). One hypothesis for human migration across this region suggests that the  
 southward migration of people just prior to the Holocene was correlated with the availability of marine resources,  
 specifically the expansion of kelp forests may have been linked to the expansion of available coastal resources and  
 thus human migration (Erlandson et al., 2007). Abundant early Holocene archaeological records from the Channel  
 360 Islands show evidence of a diversified maritime economy, consumption of shellfish, marine mammals, and fin fish,  
 yet a relatively small population size relative to later in the Holocene (Erlandson et al., 2007, 2009; Braje et al.,  
 2012). Additional localized studies of human responses to environmental and ecological variability on the Channel  
 Islands capture snapshots of human-environment interaction in the early Holocene, but do not capture the full time  
 interval and thus are not included here.

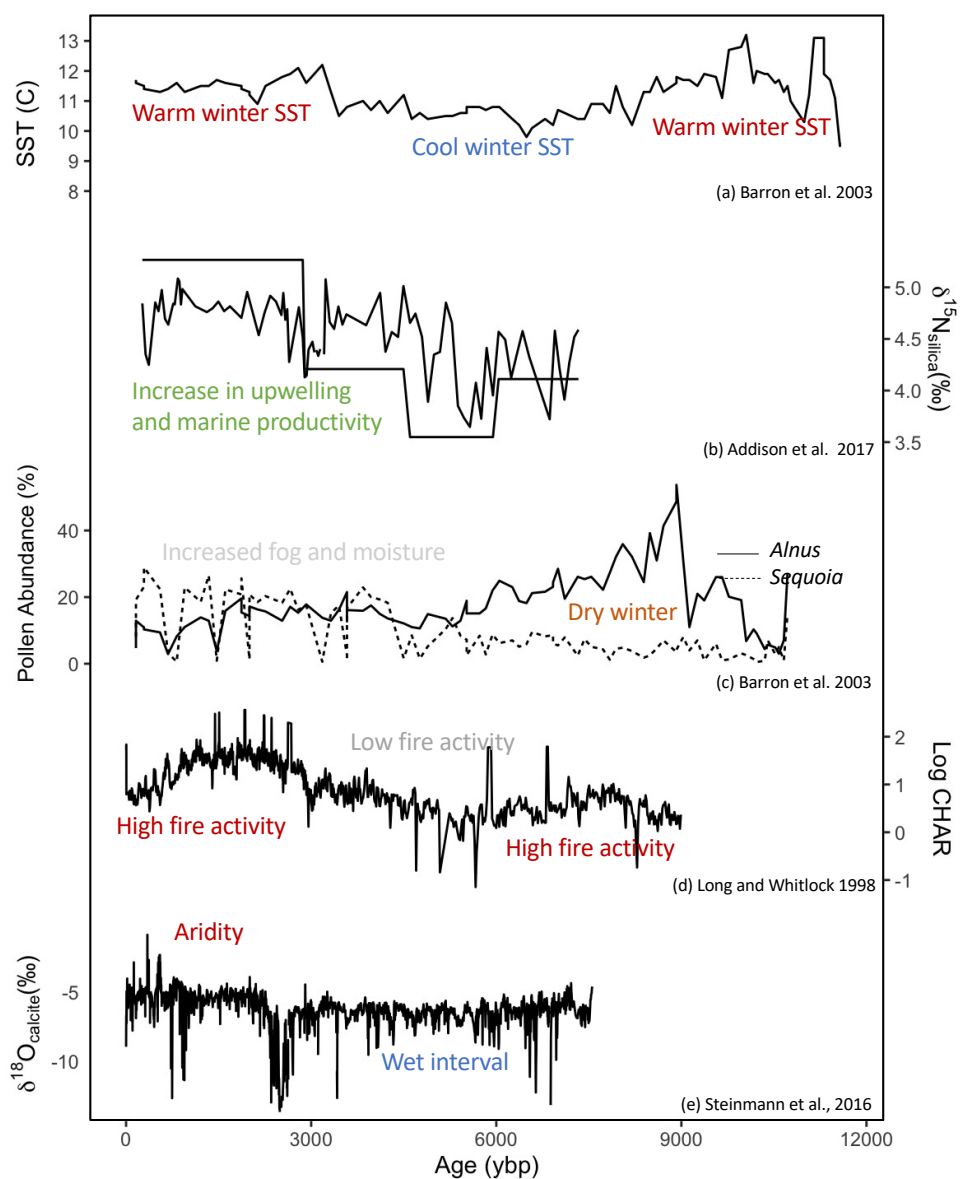

**Figure 4:** Representative datasets from the Pacific Northwest. Panels from top to bottom Alkenone sea surface temperature from core ODP1019 ((a), Barron et al. 2003). Bulk sediment  $\delta^{15}\text{N}$  and opal regime index from core TN062-O550 ((b), Addison et al. 2017). Relative abundance of pollen: solid line is *Alnus* (alder) and dashed line is *Sequoia* (coastal redwood) from core ODP1019 ((c), Barron et al 2003). Log charcoal accumulation rate at Little Lake ((d), Long and Whitlock 1998). Lake sediment bulk calcite  $\delta^{18}\text{O}$  from Cleland Lake, Washington ((e), Steinman et al. 2016).

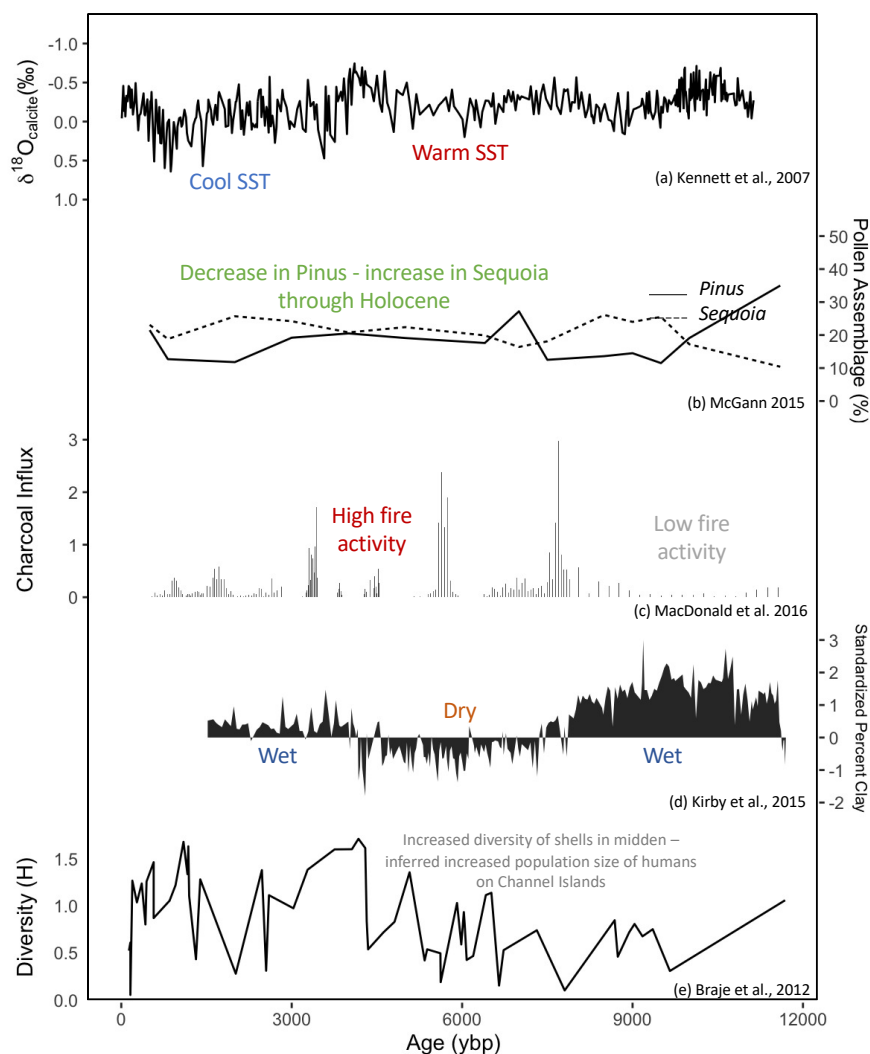

**Figure 5:** Representative datasets from the Southwest. Oxygen isotope record from planktonic foraminifera *G.*

bulloides from Santa Barbara Basin core ODP 893 ((a), Kennett et al. 2007). Pollen assemblage (%) of *Pinus* and *Sequoia* from Central California marine sediment core ((b), McGann 2015). Charcoal influx to Kirman Lake in the Sierra Nevada mountains ((c), Macdonald et al., 2016). Standardized percent clay as a proxy for relative lake status for Silver Lake ((d), Kirby et al., 2015). Diversity of shells from shell midden sites on Channel Islands, grey lines are average 6-12 ka (0.69) and 0-6 ka (0.98) ((e), Braje et al. 2012).





### 3.2 Mid-Holocene (8.2-4.2 ka)

Thirty-five papers encompassing 60 sites met the criteria for spatial analysis and were coded and plotted in Figs. 2 and 3. Archives included lake sediments (n=19), marine sediments (n=14), and two others (terrestrial midden, tree stump) (Appendix B, C).

#### 3.2.1 Regional Synthesis

Spatial analysis of coded hydroclimate, temperature, and fire history indicates that the mid Holocene was characterized by a wet and cool PNW and a dry and warm SW relative to modern conditions (Fig. 2). Fire activity was high in the Sierra Nevada mountains and variable and transitional in the PNW (Fig. 3). Time series analyses supports these findings: offshore of the PNW, sea surface temperatures were cool, upwelling activity was moderate and terrestrial PNW winters were wet, fire activity was low and variable, and the overall hydroclimate was wet relative to the early Holocene (Fig. 4). In the SW, sea surface temperatures were warm, fire activity was high, hydroclimate was generally dry, and human-environment interactions increased as populations in this region increased relative to the early Holocene (Fig. 5).

Hydroclimate and temperature trends functionally reversed in the mid Holocene relative to the early Holocene, and the mid Holocene was a time of transition and variability in many records (Figs. 4, 5). In the PNW, SST transitions from warm to cool temperatures coeval with a shift from warm and dry to cool and wet terrestrial conditions. These coincident transitions suggest that the mechanisms for marine-terrestrial climate linkages persisted through the early and mid Holocene, namely a negative correlation between marine temperatures and terrestrial moisture/precipitation (Fig. 2). Yet nuanced changes occurring on shorter timescales may play an important role in determining hydroclimate of the region. A previously published review of hydroclimate records in Western North America (PNW, northern Rockies and most of California) at 6 ka shows aridity in areas that are dominated by winter precipitation, including multi-decadal to centuries-long ‘mega droughts’ due to reduced winter water vapor transport (Hermann et al., 2018). However, our findings reveal that when evaluated at a broader timescale (8.2-4.2 ka), the mid Holocene PNW is cool and wet (Fig. 2). We posit two hypotheses to reconcile these differences. First, we propose that the coastal PNW was wet and cool whereas interior areas may have been dry (Hermann et al., 2018). Alternatively, in the PNW, this time period may have been characterized by seasonal hydroclimate extremes; multiple records identify high winter precipitation and warm summers with high evaporation (Marlon et al., 2006; Whitlock et al., 2008; Steinman et al., 2016), thus exhibiting both wet and dry phases on short timescales. As such, seasonally resolved proxies are particularly advantageous to fully capture climate in the past.

The shift in SW terrestrial hydroclimate from wet in the early Holocene to dry in the mid Holocene (Fig. 2) may be due to several processes. A southward shift in NAM occurred between 9 and 6 ka, resulting in Mexico, rather than California, receiving a higher amount of precipitation (Metcalf, 2015). Further, pluvial episodes driven by atmospheric river-type storms are rare in the mid Holocene, with the exception of one pluvial episode from 7.0-6.1 ka.

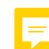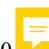



ka that is synchronous across several southern California records (Kirby et al., 2012). Both phenomena (atmospheric  
 420 rivers and NAM) are linked to changes in eastern tropical Pacific SSTs, rather than adjacent marine conditions in the  
 California Current System (Fisler and Hendy, 2008; Kirby et al., 2012; Metcalfe, 2015). Thus, the lack of  
 precipitation, driven by a local reduction in the NAM, a southward shift in the NAM, or absence of atmospheric  
 river-like storms or the combination of all three led to overall aridity in the Southwest in the mid Holocene, and may  
 not have been driven by local changes in SST of adjacent marine systems (Fig. 2).

425

### 3.2.2 Terrestrial climate

Between 8.2 to 4.2 ka, terrestrial conditions were generally cool and wet in the PNW and warm and dry in the SW,  
 while marine systems were generally cool (Fig. 2), yet the mid Holocene was a time of transition and variability in  
 terrestrial climate. A transition to cooler, wetter conditions during the mid Holocene occurred across several sites in  
 430 the PNW (Nederbragt and Thurow, 2001; Marlon et al., 2006; Long et al., 2011; Walsh et al., 2017). For example,  
 lake sediment records from north-central Washington (Scanlon and Castor Lake) demonstrate the variability in mid  
 Holocene hydroclimate including low lake stand at 7 ka and high lake stand at 5 ka (Steinman et al., 2019).

Fire records from the PNW indicate a transition in hydroclimate and vegetation (Fig. 3). Fire activity increased on  
 435 Vancouver Island, in the Oregon coast range, and in the Klamath and Siskiyou mountains through this interval  
 (Brown and Hebda, 2002; Briles et al., 2005; Whitlock et al., 2008; Long et al., 2011). In Oregon and the northern  
 Rocky Mountains, the combination of cooler, wetter conditions increased fuels and hot, dry summers led to more  
 severe and larger fires relative to the early Holocene (Marlon et al., 2006; Whitlock et al., 2008). In coastal areas,  
 increases in fire activity were linked to increased summer drought over time (Briles et al., 2005; Whitlock et al.,  
 440 2008). Yet, in other nearby regions, fire activity was variable: on Mount Rainier, fire activity increased from 8 to 6.6  
 ka and decreased from 6.6 to 4 ka (Walsh et al., 2017), in northern Washington, fire frequency decreased at the start  
 of the mid Holocene with the development of cooler, wetter summers, yet increased again at 4.5 ka (Gavin et al.,  
 2007).

In the mid Holocene, the Sierra Nevada was dry relative to the early and late Holocene (Lindstrom, 1990; Benson et  
 445 al., 2002; Hallett and Anderson, 2010; MacDonald et al., 2016). A northerly shift in the Intertropical Convergence  
 Zone (ITCZ) in the mid Holocene led to reduced winter precipitation (including snowpack), which led to drier  
 summers and increased fire frequency relative to early Holocene (Hallett and Anderson, 2010). Previous work  
 investigating paired marine-terrestrial records from the Sierra Nevada (Kirman Lake) and eastern tropical Pacific  
 450 highlight the connection between SST cooling (in the eastern tropical Pacific) and increased aridity (MacDonald et  
 al., 2016). The marine-terrestrial link driving precipitation patterns was strongest throughout the mid Holocene,  
 particularly from ~ 8 to 3 ka (MacDonald et al., 2016). The combination of aridity and increased biomass, led to  
 control of fire by climate in the Sierra Nevada Mountains (Fig. 3) (Hallett and Anderson, 2010). Increased fire  
 activity was synchronous with warming in the Eastern Sierra beginning at 5 ka (Hallett and Anderson, 2010).  
 455 Additionally, high fire frequency in Lake Tahoe Basin in the mid Holocene (peak at 6.5 ka) was synchronous with



high fire frequency in N. California and Oregon and is attributed to warm dry climate in the Lake Tahoe Basin at this time (Beaty and Taylor, 2009).

In the SW, the mid Holocene is characterized by generalized arid conditions. Lake records from the Mojave Desert (Silver Lake, California) indicate a distinct dry period from ~4.2-7.8ka (Kirby et al., 2015). Vegetation traces (macrofossils and pollen) from packrat middens in the Mojave Desert indicate increased aridity compared to modern with a particularly arid period from 6.8 to 5.0 ka (Spaulding, 1991). Pollen records from marine sediments offshore Central California identify a “mid Holocene dry period” from 8-6.4 ka (McGann, 2015). On the Channel Islands, hydroclimate conditions shifted from dry to wet at ~6.9 ka, coincident with an increase in fire activity (Anderson et al., 2010). Despite aridity in the desert SW, marine sediment records from SBB show extreme precipitation events with increased flooding occurring between 7.3-6.6 ka and 5.5-3.0 ka (Du et al., 2018). Finally, lake sediment records from Lake Elsinore show multiple pluvial episodes and lower relative evaporation in the mid Holocene (Kirby et al., 2019).

### 3.2.3 Marine conditions

In the mid Holocene, records indicate that off the coast of Oregon and California, sea surface temperatures were cool, while the Santa Barbara Basin was warm (Fig. 2) (Mix et al., 1999; Fislér and Hendy, 2008; Barron and Anderson, 2011; Barron et al., 2019). Generally, the North Pacific was experiencing negative PDO or La Niña-like conditions, with a weak/west-shifted winter Aleutian Low and strong/northward summer North Pacific High (Barron and Anderson, 2011). A dominant feature of mid Holocene Eastern North Pacific oceanography was an increase in coastal upwelling. Marine sediment records from offshore of northern California (40.9°N, 124.6°W) suggests a two-fold increase in upwelling and coastal fog beginning at 5.4 ka and a decrease in SST at 5 ka (Barron et al., 2003b; Addison et al., 2017). Coastal upwelling off California was enhanced during the summer and fall but suppressed during the spring as a result of a strong North Pacific High driven by orbital forcing (Diffenbaugh et al., 2003; Diffenbaugh and Ashfaq, 2007; Barron and Anderson, 2011). The increase in upwelling is due to a strengthening of the California Current and is documented as far south as Point Conception but is not documented in Santa Barbara Basin (Barron and Bukry, 2007a). Despite a cooling trend seen in multiple records from off the coast of Oregon and northern California, records from offshore Central California (Farallon Escarpment) show a slight warming trend through time, but at a decreased rate relative to the early Holocene, a decrease in carbonate productivity and total carbon export, relative to the early Holocene and continued low oxygen at depth (McGann, 2011). Warming conditions through the mid Holocene observed offshore Central California conflict with studies from further north showing a cooling trend, but compare favorably with records of warming from farther south (McGann, 2011).

Sea surface temperatures during the mid Holocene were generally warm in SBB and periodically punctuated by short cool periods at 8.2, 7.6, 5, 4.2 ka (Fislér and Hendy, 2008) and an interval of cold, high productivity from 5.8-6.3 ka (Kennett et al., 2007). Additional evidence from SBB shows that the mid Holocene was warmer and more variable than the early Holocene which may have been due to increased decadal scale variability (Friddell et al.,



2003; Fislér and Hendy, 2008). SSTs in SBB initially rose by 3–4°C followed by an abrupt increase of > 2°C in less than 40 years at 7.5 ka (Friddell et al., 2003). Nearshore conditions on the Channel Islands were variable with an interval of cooler than modern SST during 6.3–5.3 ka preceded and followed by intervals of warmer than modern SSTs (Glassow et al., 2012). Circulation and ventilation of relatively young North Pacific Intermediate Water into SBB was stable through the mid Holocene (Roark et al., 2003). When compared to global records, SST trends from the North Pacific (generalized warming in the North Pacific from 7 ka to present) are inversely correlated with the SST in the North Atlantic (Kim et al., 2004).

500

### 3.2.4 Ecological responses to climate change

In the PNW, ecosystems responded to increases in moisture in the mid Holocene. The establishment of rainforest taxa in northern Cascades forest occurred during wet conditions and a variable fire regime in the mid Holocene (Hallett et al., 2003). Lake sediment records from near Mount Rainier show a shift to cooler, wetter conditions and a transition to mesic forests, indicating an increase in effective moisture (Walsh et al., 2017). In British Columbia, mild winters led to an increase in oaks, hemlock, and grasses during this interval (Pellatt et al., 2001). In northern Washington, lodgepole pine-dominated forest transitioned to a forest with abundant western white pines and Douglas-fir trees (Gavin et al., 2003, 2007). Near the end of the mid Holocene (~4.5 ka), fire frequency once again increased, despite the development of the modern western hemlock and redcedar forest that typically indicate cooler, wetter climate and mild summers (Gavin et al., 2003, 2007). In contrast, one record from the Saanich Inlet (British Columbia) shows that oak and Douglas fir increased during this time (Heusser, 1983, p.19). In northern California, terrestrial systems shifted from dominance by pine to an increased presence of *Sequoia* coastal redwoods, indicating an increase in fog (Barron et al., 2017)

Farther south, pollen records from Santa Barbara Basin show numerous changes in terrestrial ecosystems during this interval, including a decrease in *Pinus* and conifers; a general decrease in all trees leads to a temporary peak in herbaceous plants (*Asteraceae*) (at 5 ka) followed by a transition to a chaparral, coastal sage scrub dominated ecosystem and an increase in oaks (Heusser, 1978, 1998). A brief period of dry conditions from 8–6.4 ka led to an increase in herbs (*Asteraceae*) and pines with a coincident decrease in oaks and tanoak (*N. densiflora*) in Central California (McGann, 2015). In southern California, salt marsh fauna peaks at 6 ka and riparian community plants generally decrease through the Holocene; changes that are linked to drying trends in the SW in the mid Holocene (Heusser, 1978).

In marine systems offshore northern California, the increase in upwelling through the mid Holocene impacted both planktic and benthic ecosystems. For example, *T. nitzschoides* dominate the diatom/silicoflagellate assemblage, which indicates a shallow thermocline, high productivity within the California Current, and increased upwelling (Gardner et al., 1988; Barron et al., 2017). In SBB, an increase in warm water planktics and a *Neogloboquadrina incompta* dominated assemblage indicates a stable, warm, and stratified water column (Fislér and Hendy, 2008). The establishment of the modern low oxygen zone continues in this interval, with important implications for seafloor



530 ecosystems including the development of a novel community between 7-5 ka, associated with sulfide-rich, anoxic  
 chemosynthetic seafloor ecosystems in SBB (Moffitt et al., 2015).

### 3.2.5 Human-environment interactions

535 Similar to the early Holocene, much of the evidence of human activity and interaction with the environment during  
 the mid Holocene is centered at the Channel Islands due to exceptional preservation of shell middens. In the mid  
 Holocene, human population on the Channel Islands increased resulting in enhanced marine harvesting pressure  
 after 6 ka, as indicated by an increase in shell midden diversity (Fig. 5) (Braje et al., 2012). Increased reliance on  
 marine resources for food may have also been due to severe arid conditions (6.3 – 5.0 ka) that reduced terrestrial  
 resources and availability of drinking water. This environmental shift facilitated an increase in fisheries as well as  
 540 coastal shellfish harvesting (Kennett and Kennett, 2000; Kennett et al., 2007). Further, evidence of exchange  
 between people on the Channel Islands with people in the Great Basin increased during this time and by the mid  
 Holocene, semi-permanent villages were established on the Channel Islands (Kennett and Kennett, 2000; Kennett et  
 al., 2007). As in the early Holocene, records of human community occupation and interactions with the environment  
 are widespread in the mid Holocene, yet most represent snapshots in time and thus, are not included in the review.

545

### 3.3 Late Holocene (4.2 ka-present)

Twenty-eight papers encompassing 66 sites met the criteria for spatial analysis and were coded and plotted in Figs. 2  
 and 3. Archives included lake sediments (n=16) and marine sediments (n=12) (Appendix B, C).

#### 3.3.1 Regional Synthesis

550 Analysis of coded hydroclimate, temperature, and fire history shows that the late Holocene was characterized by a  
 wet PNW and wet and variable SW relative to the early and mid Holocene (Fig. 2). Marine temperatures were warm  
 while terrestrial temperatures were cool and variable across both regions (Fig. 2). Fire activity was high and varied  
 across both regions (Fig. 3). In the PNW, SSTs were warm, upwelling activity was high, coastal fog and moisture  
 555 increased, fire activity was high, and the overall hydroclimate was variable (Fig. 4). In the SW, SSTs were variable,  
 fire activity was high and variable, hydroclimate was generally wet, and human-environment interactions increased  
 as populations in this region grew (Fig. 5). Due to the accessibility of more recent records, late Holocene records  
 are abundant, yet despite this, fewer late Holocene studies were included in the coded spatial analysis relative to the  
 mid or early Holocene as relatively few presented a coherent finding for the entire interval and intra-record  
 560 variability was high in the late Holocene. Although for some records, temporal resolution increases towards the  
 present, increased variability relative to the early and mid Holocene is persistent across multiple proxy types and  
 temporal scale of record.

In comparison to the early and mid Holocene, the late Holocene shows greater variability in hydroclimate,  
 565 temperature, and fire history both within and among records. Marine-terrestrial linkages in the late Holocene also  
 show high variability and an increase in dominance of decadal to annual phenomena (Fig. 2). Coastal upwelling and



precipitation are linked; intervals of stronger upwelling are linked to wetter conditions, and reduced upwelling is tied to aridity. In the late Holocene, upwelling and precipitation increased in magnitude and variability through this interval (Ingram, 1998; Addison et al., 2017). Changes in PDO exerted control on terrestrial hydroclimate. A period of negative PDO at 1.1-0.7 ka, with cooler North Pacific SST and higher upwelling, is coeval with prolonged drought in western North America (MacDonald and Case, 2005). Southwestern droughts in late Holocene co-occur with cooler than average SST in SBB. Similarly, nearshore records from Central California show high SST variability coincided with drought during the interval from 0.7-0.5 ka (Fig. 2) (Jones and Kennett, 1999; Barron et al., 2010). Late Holocene changes to PDO and ENSO progressed northward, with enhanced ENSO/PDO effects beginning at 4 ka in southern California and 3.4 ka in northern California (Barron and Anderson, 2011). Further, the late Holocene exhibited alternating wet and dry cycles that may be linked oscillation of precipitation sources between tropical and North Pacific-sourced water (Feakins et al., 2014; Kirby et al., 2014). High variability within and between records (Figs. 2, 3) is a dominant trend across both the PNW and SW in the late Holocene.

### 3.3.2 Terrestrial climate

Hydroclimate varies spatially and temporally through the late Holocene with the highest and most variable fire activity relative to the early or mid Holocene (Figs. 2, 3). In the PNW, multiple records show a cool and wet climate, with pronounced wet periods (Mohr et al., 2000; Nederbragt and Thurow, 2001; Reyes and Clague, 2004; Briles et al., 2005; Malamud-Roam et al., 2006). However, trends of increasing aridity towards the present and intervals of drought are also documented (Steinman et al., 2016, 2019; Walsh et al., 2017; Shuman et al., 2018). In the San Francisco Bay region, hydroclimate was also variable, with intervals of aridity documented at 3.0-2.5 ka and 1.7-0.73 ka (Byrne et al., 2001; McGann, 2008).

In the PNW, fire activity was high and variable in the late Holocene, despite intra-regional differences in hydroclimate and vegetation. Fire activity on Mount Rainier was highest in the past 4 ka relative to the rest of the Holocene, and conditions became increasingly dry throughout the late Holocene (Steinman et al., 2016, 2019; Walsh et al., 2017). Vegetation records show a surprising dominance of flora associated with cooler, wetter conditions despite the highest number of fire episodes and shortest fire return intervals during this period (Walsh et al., 2017). In North Cascades National Park in northern Washington, high variability in fire frequency and lower synchrony among forest fire events occurred even within the same forest. A decrease in fire frequency from 3.5-2.4 ka corresponded with a cool, humid climate, while high fire frequency from 2.4-1.3 ka suggests more frequent prolonged summer drought (Hallett et al., 2003; Gavin et al., 2007). In this region, the present-day fire regime was established by 1.3 ka (Hallett et al., 2003; Gavin et al., 2007). In the Oregon coast range, changes in vegetation led to a decrease in fire activity beginning at 2.75 ka. The increase in fire frequency and variability in the PNW may have been due to changes in forest composition, changes in temperature and precipitation, increased ENSO frequency leading to increased summer drought, or due to increases in human population and thus, human-induced fire (Walsh et al., 2017). Despite an increase in precipitation and a decrease in temperature, charcoal accumulation rates from the Oregon Coast Range and northern California (Klamath-Siskiyou Mountains) suggest that fires



became larger and more severe in this region, with high variability during the latter part of the Holocene, likely due to increases in woody vegetation to fuel forest fires (Marlon et al., 2006, 2013; Whitlock et al., 2008).

Spatial and temporal variability in climate and fire history occurred across the Sierra Nevada mountains (Figs. 2, 3). In the eastern Sierras, hydroclimate varied throughout the late Holocene; Mono Lake water level fluctuated through this time (3.77 ka- highest in last 7 ka, 1.8 ka low stand, multiple rapid fluctuations in last 1.2 ka), Owens Lake exhibited three intervals of wetter and cooler climate at 3.6 ka, 0.8 ka, and 0.35 ka (Bacon et al., 2018), and increased precipitation through the late Holocene at Pyramid Lake led to rising lake levels (Benson et al., 2002). Strong fire synchrony occurred in the Sierra Nevada since 2.5 ka which is linked to periods of drought (Hallett and Anderson, 2010). In the Lake Tahoe Basin, changes in vegetation from open forest to mesic forest drive a decline in fire frequency from the Mid-Holocene to modern, with a particularly low fire interval from 4.0 to 3.5 ka (Beatty and Taylor, 2009). Records from the Sierra Nevada show glacial advancement linked to cooling beginning 3.9 ka (Konrad and Clark, 1998)

In Central and southern California, multiple wet and dry phases occurred through the late Holocene (Fig. 2) (Feakins et al., 2014; Kirby et al., 2014). In coastal Central California, marine records show that winter precipitation increased in the late Holocene (McGann, 2011). Several lake records from southern California (Lower Bear Lake, Lake Elsinore, Tulare Lake, and Owens Lake) all indicate a return to wetter conditions beginning between 4.0-3.35 ka (Kirby et al., 2010, 2014). Records from coastal lagoons on Santa Rosa Island and in southern California show multi-centennial fluctuations between wet and dry conditions (Davis, 1992; Anderson and Byrd, 1998; Cole and Wahl, 2000; Anderson et al., 2010). Similarly, records from Zaca Lake and Lake Elsinore indicate multiple wet and dry intervals, including multi-centennial drought from 2.0-2.7 ka (Dingemans et al., 2014; Kirby et al., 2014, 2019). This alternation of wet and dry cycles may be linked to alternation of precipitation source water between more tropical and more North Pacific source water (Feakins et al., 2014; Kirby et al., 2014). In some records, a late Holocene Dry Period (1 – 0.2 ka) is identified (Platzman and Lund, 2019), and persistent droughts and elevated aridity are dominant across the Western US from 1.1 to 0.7 ka (Cook, 2004). In the Mojave Desert (Silver Lake, California) conditions returned to ephemeral, wet lake conditions beginning at 3.8 ka after a mid Holocene period of aridity (Fig. 5) (Kirby et al., 2015). Yet other records show increased aridity in the Mojave Desert compared to the mid Holocene (Spaulding, 1991).

Across the study region, extreme events (rainfall, drought, flooding) become a dominant feature across multiple records over the past 2 ka (Cook, 2004; Malamud-Roam et al., 2006; Rasmussen et al., 2006; Kirby et al., 2015). A pronounced megadrought occurred in Western North America from 1.1 - 0.7 ka, that was previously linked to cool SST over the Eastern Tropical North Pacific (Cook, 2004). More variable conditions have been attributed to changes in insolation as well as shorter term processes including ENSO and PDO (Cook, 2004; Kirby et al., 2007, 2010; Barron and Anderson, 2011). Gradual decreases in summer insolation and increases in winter insolation contribute to maximum drying in the late Holocene relative to the early Holocene (Kirby et al., 2007). Enhanced PDO and





ENSO variability in the last 4 ka contribute to increased terrestrial hydroclimate and temperature variability (Kirby et al., 2010; Barron and Anderson, 2011).

### 3.3.3 Marine Conditions

645 In the late Holocene, SST increased and spring upwelling increased off the coast of Oregon and California and SST decreased in the Santa Barbara Basin relative to the mid Holocene (Figs. 2, 4, 5) (Barron et al., 2003a; Kennett et al., 2007; Barron and Anderson, 2011). Late Holocene marine conditions show increased variability in SST, intensification of the California Current, and increased upwelling relative to the mid Holocene (Fig. 3) (Barron and Bukry, 2007a; Barron and Anderson, 2011). While global records suggest a shift in climate characteristics at 4.2 ka, 650 several California and Oregon records experience a delayed mid to late Holocene shift (Barron and Bukry, 2007a; Addison et al., 2017; Barron et al., 2017). Modern seasonality within the California Current (strong spring-summer upwelling with cool SSTs, and relaxation with warmer SSTs during fall) was established between 3.5 and 3.2 ka (Barron and Bukry, 2007a). Diatom-based productivity increased at 2.9 ka offshore of northern California and changes in relative abundance of diatom and pollen species suggest significantly increased upwelling and 655 productivity at this time (Addison et al., 2017). Additional evidence from offshore of northern California shows cooler SSTs occurred from ~3.6 and 2.8 ka, accompanied by increased precipitation, an abrupt warming of winter SSTs at 2.8ka, and an intensification of spring upwelling beginning 2.6 ka (Barron et al., 2017). Since 2.6 ka, PDO-like warm-cool oscillations have dominated the SST regime (Barron et al., 2017).

660 Further south, off the coast of Santa Cruz, California, upwelling and productivity increased steadily through the late Holocene (Barron et al., 2019). Additional records from offshore Central California indicate the late Holocene marked the onset of warm modern offshore conditions with high productivity (total and organic carbon export) relative to the mid and early Holocene (McGann, 2011; Barron et al., 2019). Marine oxygenation off the coast of Central California declined through the late Holocene (McGann, 2011). Nearshore records from Central California 665 show that SST was 1°C cooler than modern from 2-0.7 ka (Jones and Kennett, 1999).

In southern California, late Holocene SST cooling with high SST variability (in Santa Barbara Basin) began at ~4 ka (Fig. 5) (Kennett et al., 2007; Fisler and Hendy, 2008). High amplitude changes in salinity due to variability of input of freshwater into the basin are documented within SBB (Kennett et al., 2007). Brief cold events occurred in SBB at 670 ~4.2-3.8, 1.5-1.2, and 0.8-0.3 ka and correspond to glacial advances in the Sierras (Fisler and Hendy, 2008). Variable oceanographic conditions in the late Holocene may be due to increasing ENSO variability in the tropical Pacific (Barron and Bukry, 2007b). Intensification of the California Current and increased East-West seasonal gradients (driving increased winds that enhance upwelling) are documented offshore northern California (Barron et al., 2003b; Barron and Bukry, 2007b, b) and across the southern California Borderlands. Nearshore records from 675 Santa Cruz Island show persistently cold SSTs and persistent upwelling on the west coast of Santa Cruz Island in late Holocene compared to a wider range of nearshore conditions on the south side of the island (Flores, 2017). In deeper waters, a drastic change in the age of North Pacific Intermediate Water in SBB (shift to older water and



lower bioturbation) at 2 ka with a subsequent stable age of water entering from 2 ka to present suggests changes in the North Pacific Intermediate Water circulation pattern (Roark et al., 2003). This shift is concurrent with a decrease in Greenland temperature and increase in ice accumulation rate suggesting trends in SBB relate to larger atmospheric circulation patterns (Roark et al., 2003). Further, the oxygen minimum zone persists in intermediate waters off the coast of southern California, but is reduced in intensity relative to the mid Holocene (Balestra et al., 2018; Wang et al., 2020).

### 3.3.4 Ecological responses to change

Forested ecosystems in the PNW and northern California transitioned to modern temperate, cool, wet, highly fire-adapted systems with increased fir and pine (Heusser, 1983; Mohr et al., 2000; Pellatt et al., 2001; Barron et al., 2003b, 2019; Briles et al., 2005; Anderson et al., 2013) while SW systems became increasingly dominated by chaparral and sage scrub ecosystems (particularly since ~2.5 ka) (Heusser, 1978; Anderson and Byrd, 1998; Cole and Wahl, 2000; Anderson et al., 2010; Dingemans et al., 2014). In the Siskiyou mountains, a shift in hydroclimate to wet, cool conditions at 2.1 ka led to the development of the modern forest dominated by firs (*Abies*) and cypress (*Pseudotsuga*) and moderated by a modern fire regime (Briles et al., 2005). In parallel with increases in hydroclimate and temperature variability, in northern California the amplitude and frequency of changes between pine and alder intensified in the late Holocene and coastal scrub expanded (Fig. 4) (Barron et al., 2003b; Anderson et al., 2013). In Central California, changes to forest assemblages occurred gradually through time, trending towards decreased dominance of pine in the modern (Fig. 5) (McGann, 2015; Barron et al., 2019). Finally, in southern California, ecological change varied locally, with transitions in pollen regimes indicating increased moisture occurring around 2 ka in multiple records (Anderson and Byrd, 1998; Cole and Wahl, 2000; Dingemans et al., 2014).

Marine ecosystems reflect the establishment of modern levels of coastal upwelling and productivity in the late Holocene (Addison et al., 2017; Barron et al., 2017). Offshore northern California, the gyre-associated diatom species *Pseudoeunatia doliolus* increased threefold indicating the onset of modern oceanographic conditions in this region (Barron et al., 2003b). Offshore Central California, upwelling evolved gradually over time and the upwelling-indicator diatom species *T. nitzschioides* gradually increased through this interval (Barron et al., 2019). In SBB, late Holocene cooling led to an increase in the abundance of cold-associated (*N. pachyderma*) and upwelling-associated (*Globigerina quinqueloba*) planktic foraminifera (Fisler and Hendy, 2008). Oxygen deficient zones were well established by the late Holocene and persisted throughout the interval, structuring seafloor and pelagic ecosystems (Ohkushi et al., 2013; Moffitt et al., 2014, 2015).

### 3.3.5 Human-environment interactions

Human-environment interactions are well documented in the late Holocene relative to previous time intervals both due to the increase in human population and the preservation bias in archaeological records and recency bias in oral histories. In multiple locations, a late Holocene drought was a destabilizing factor for societies. In the SW, a 26-



715 year-long drought that occurred 0.8 ka is linked to social destabilization and abandonment of well-established  
 Ancestral Puebloan villages (deMenocal, 2001). In northern California, the abandonment of shell mounds following  
 four millennia of occupation (5 to ~1.2 ka) co-occurs with drought in this region revealing potential societal impacts  
 of drought (Ingram, 1998). Human control of the fire regime led to land use and ecosystem changes across the  
 Western US during this interval. In Washington, an increase in human artifacts in the subalpine zone beginning at  
 720 3.6 ka, combined with a change in climate and thus ranges of game species, provide some evidence for increased  
 presence of people in subalpine terrain and potentially an increase in human-caused fire (Walsh et al., 2017). Across  
 California, late Holocene increases in chaparral, grassland, and sage scrub ecosystems were reinforced by intentional  
 burning and prescribed burning played an important role in structuring ecosystems (Heusser, 1978; Anderson et al.,  
 2010, 2013; Cowart and Byrne, 2013; Lightfoot and Cuthrell, 2015; Klimaszewski-Patterson et al., 2021).

725 Human interactions with the marine environment were critical factors in structuring societies, and conversely,  
 changes in ocean conditions impacted users of coastal resources. In Central California, marine resources including  
 shellfish and fish, were harvested throughout the late Holocene (Jones and Kennett, 1999). Occurrence of drought  
 from 0.5-0.3 ka led to an increase in fish bone presence in middens, indicating enhanced use of fisheries as a  
 730 resource during a time of drought, despite a documented decrease in marine productivity and high-amplitude marine  
 seasonality coeval with the interval of drought (Jones and Kennett, 1999). Indigenous coastal populations were  
 highly reliant on marine resources (largely *Mytilus californianus*) and even inland occupants of Central California  
 traveled to the coast seasonally to harvest mussels (Jones et al., 2008). On the Channel Islands, human population  
 and sociopolitical complexity increased in the late Holocene (Rick, 2011; Braje et al., 2012). As populations  
 735 increased, diet breadth expanded and human harvesting pressure on marine ecosystems increased, including an  
 expansion of consumption of finfish and pinnipeds and a diversification of taxa in middens (Erlandson et al., 2009;  
 Rick, 2011; Braje et al., 2012). Expansion of sociological complexity, and competitive (including violent conflict)  
 and cooperative strategies on the northern Channel Islands from 1.3-0.7 ka is attributed to of high climatic  
 740 instability, cool marine conditions with relatively high productivity, low terrestrial productivity, and aridity (Kennett  
 and Kennett, 2000). This climate instability led to conflicts over resources, but eventually resulted in more complex  
 sociopolitical societies due to the need to cooperate, regulate, and manage resources (Kennett and Kennett, 2000).  
 Human-environment interactions and Indigenous land stewardship were important environmental and ecological  
 drivers throughout the late Holocene. The onset of colonization, genocide of Indigenous people, land-use change,  
 urbanization, industrialization, and anthropogenic climate change in the last few hundred years dramatically  
 745 impacted climate, ecosystems, and records used to interpret past change (see Sect. 3.5 on Era of Colonization  
 below).

### 3.4 Medieval Climate Anomaly and Little Ice Age

750 Specific investigation of the Medieval Climate Anomaly (MCA) and the Little Ice Age (LIA) are included in some  
 of the papers reviewed here. Generally, the MCA was an anomalously warm event that is linked to pronounced  
 drought conditions throughout the Western United States. Alternatively, the LIA was a brief period of cooling



predominantly identified in Northern Hemisphere records (Cook, 2004). Evidence of dry conditions during the MCA is indicated in a breadth of records: from Mono Lake and Owens Lake in the Eastern Sierra Nevada (Stine, 1990; Bacon et al., 2018), freshwater input into San Francisco Bay, Abbot Lake and Zaca Lake in coastal Central California (Dingemans et al., 2014; Hiner et al., 2016; Platzman and Lund, 2019), Central California pollen history (McGann, 2015), flood events in SBB (Schimmelmann et al., 2013; Du et al., 2018), tree stump dating in the Sierra Nevada (Stine, 1994), and a synthesis of tree-ring records (Cook, 2004). Dry conditions were likely caused by anomalously warm terrestrial temperatures and are linked to cool SSTs over the Eastern Tropical Pacific (Cook, 2004) and in the adjacent Santa Barbara Basin (Kennett and Kennett, 2000; Fisler and Hendy, 2008; Barron et al., 2010; Asmerom et al., 2013). Fire activity increased in the MCA in the Eastern Sierra and Lake Tahoe Basin, which may be due to warm summer enhanced growth and decreased snowpack, but in Western North America more broadly, fire activity was reduced during the MCA and LIA relative to the past 3 ka (Beaty and Taylor, 2009; Hallett and Anderson, 2010). The LIA was characterized by warm SSTs in southern California, wetter conditions in the Sierra Nevada and southern California, and minimum fire frequency in Western North America (Reyes and Clague, 2004; Whitlock et al., 2008; Barron et al., 2010; Feakins et al., 2014; Kirby et al., 2019). Further investigation of the MCA and LIA are merited but are not within the scope of this paper.

### 3.5 Era of Colonization

Humans have been interacting with the environment in Western North America throughout the entirety of the Holocene. As described above, Indigenous peoples exerted control of fire and interacted with, managed, and cultivated marine and terrestrial plants and animals throughout the Holocene (Braje et al., 2012; Taylor et al., 2016; Platzman and Lund, 2019; Ellis et al., 2021; Klimaszewski-Patterson et al., 2021; Minnis, n.d.). Yet, the impacts of settler colonization, genocide of indigenous people, and conversion to Western, Euro-centric land and marine management practices are evident in many records examined here and represent an unprecedented environmental regime in multiple records (Ellis et al., 2021).

Impacts of land-use change and human control of fire at the time of colonization precede changes due to urbanization and anthropogenic climate change (Waters et al., 2016). Changes in the view and management of fire shaped the landscape and climate in the last several hundred years, beginning with a measurable increase in fire (relative to Indigenous prescribed burning) following settler colonization and a subsequent measurable decrease in fire in the last 100 years due to fire suppression (Gavin et al., 2007; Anderson et al., 2010, 2013; Dingemans et al., 2014; Taylor et al., 2016; Walsh et al., 2017; Platzman and Lund, 2019). Prior to 1860, fire activity in the Sierra Nevada was positively correlated with temperature, but in the last 150 years (after 1860 CE) fires are linked to human activity and socio-ecological change, rather than temperature or moisture (Anderson et al., 2013; Taylor et al., 2016). In the Sierra Nevada the highest fire activity in the last 400 years occurred following Spanish colonialism and the lowest fire activity occurred with the onset of fire suppression beginning in 1904 CE (Taylor et al., 2016). In coastal Central California recent increases in fire beginning in the mid nineteenth century are attributed to burning of logging slash (Cowart and Byrne, 2013).

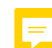



790 Increases in extractive processes and land-use conversions for ranching and agriculture have also contributed to  
 changing fire regimes over the last several hundred years and led to changes in hydrology and landscape  
 geomorphology (Heusser, 1983; Byrne et al., 2001; Cowart and Byrne, 2013; Platzman and Lund, 2019). Pollen  
 records in British Columbia show the impacts of colonization, logging, farming, and urbanization on local terrestrial  
 ecosystems (Heusser, 1983). Influx of freshwater to the San Francisco Bay decreased dramatically relative to the  
 795 late Holocene at 1930 CE due to diversion of upstream water flow (Byrne et al., 2001). The extractive processes of  
 the Gold Rush Era (beginning at 1850) in northern California led to increased sedimentation and heavy metal  
 pollution in the San Francisco Bay Delta; post-colonization lead (Pb) levels are unprecedented throughout the rest of  
 the Holocene and concentrations of Sr, Ti, Cu, Ni, and Zn also increased following colonization (Fard et al., 2021).  
 The onset of logging and ranching caused land use change including transition of redwood forest to grasses and oak  
 800 landscapes in coastal Central California (Cowart and Byrne, 2013). Further, the introduction of non-native species is  
 well documented across the region (Anderson and Byrd, 1998; Cole and Wahl, 2000; Anderson et al., 2010, 2013;  
 Dingemans et al., 2014). The impact of both a changing fire regime and land use change resulted in shifts in  
 terrestrial ecosystems (Cowart and Byrne, 2013; Dingemans et al., 2014; Platzman and Lund, 2019).

805 Human impacts on nearshore marine ecosystems are documented throughout the Holocene (as discussed above). Yet  
 widespread and detectable impacts of land use change and anthropogenic climate change on marine systems do not  
 appear until the last several hundred years, following colonization and the Industrial Revolution, respectively. Land  
 use change and the conversion of land to rangeland and cultivated agricultural land beginning around 1800 CE led to  
 the collapse of benthic marine ecosystems and may have contributed to a decrease in oxygenation across the  
 810 southern California Bight (Christensen et al., 1994; Tomasovych and Kidwell, 2017; Wang et al., 2017; Palmer et  
 al., 2020). Impacts of anthropogenic climate change on marine systems in this region include species range shifts  
 caused by rising SSTs and geochemical and structural changes to organisms due to ocean acidification; these  
 changes represent a divergence from scales of past variability (Field et al., 2006; Pak et al., 2016; Osborne et al.,  
 2020). Human activity, including intentional use and alteration of marine and terrestrial systems, has been a feature  
 815 of Western North America throughout the Holocene that is detectable in multiple archives (lake sediments, marine  
 sediments, archaeological records), yet colonization, urbanization, and industrialization led to a novel environmental  
 interval.

#### 4 Conclusions

820 Understanding Holocene climate and oceanographic patterns in the Western United States and California Current  
 System is critical for contextualizing and predicting modern changes. Relative to pre-Holocene conditions, the early  
 Holocene was dry and warm in the PNW and wet and warm in the SW; sea surface temperature was warm along the  
 coast (Fig. 2). The mid Holocene was characterized by a wet, cool PNW and dry, warm SW with generalized cool  
 825 SST, except for Santa Barbara Basin (Fig. 2). The late Holocene is the most variable interval with a general pattern



of warm marine conditions and cool terrestrial conditions (Fig. 2). Control of fire regime shifts throughout the Holocene; in the early Holocene, fire activity is linked to changes in vegetation following the deglacial, but in multiple locations shifts to control by climate in the mid Holocene and in most records is highest and most variable in the late Holocene (Fig. 3). Human-environment interactions persist throughout the Holocene and impact the climate, landscape, and ecosystems of Western North America. Prior to settler colonization, marine harvesting and prescribed burning shaped past ecosystems and landscapes, while intervals of drought and variability in marine productivity impacted sociological complexity and migration of Indigenous people. Impacts of settler colonization, urbanization, and industrialization in recent centuries are documented broadly and, in some cases, represent divergences from scales of expected variability as recorded throughout the rest of the Holocene.

Multiple factors combine and interact to drive climate changes through the Holocene across timescales including orbital forcing, ice sheet dynamics, solar forcing, annual to decadal phenomena, and marine-terrestrial interactions. Orbital forcing, including the northern hemisphere solar insolation peak in the early Holocene, drives climate change on millennial timescales. Annual to decadal phenomena such as ENSO and PDO become dominant drivers of climate in the late Holocene and lead to increased temporal variability. The relationship between marine and terrestrial systems evolves through time; notably, continental conditions in the Pacific Northwest and Southwest respond differently to changes in marine conditions. In the PNW broadly, marine temperatures are inversely correlated with precipitation. In the early Holocene, warm SSTs coeval with warm, dry inland conditions, in the mid Holocene, the trend reverses. Yet, the increase in upwelling as a dominant oceanographic feature throughout the Holocene complicates this relationship, as upwelling in the PNW is positively correlated with precipitation yet characterized by cool SSTs. Thus, in the late Holocene, the interaction between an enhanced upwelling regime yet generalized warm SST patterns may both play a role in influencing terrestrial hydroclimate. In contrast, in the SW, marine temperatures are generally positively correlated with precipitation; warm intervals (such as the early Holocene) coeval with wet intervals and periods of drought coeval with cool SSTs offshore southern California. In addition to marine-terrestrial interactions on regional scales, changes in source and strength of precipitation sources impact hydroclimate of the region; for example, changes in the intensity or geographic extent of the North American Monsoon and occurrence of atmospheric-river storms are both linked to processes in the Eastern Tropical North Pacific and have implications for hydroclimate across the region studied here.

Although general trends can be identified across broad regions (PNW and SW), local factors play a key role in determining the exact conditions for a particular location. Complete synchrony between records across a full time period for marine conditions, for terrestrial climate, or for fire activity is functionally absent; multiple anomalous or contradictory records exist (Figs. 2, 3). For example, fire activity in adjacent lake basins show different trends and nearshore vs. offshore records of marine conditions present apparently competing evidence (Fig. 3). Marine sediment records from Santa Barbara Basin are often utilized as records of the entire North Pacific, but here we find that trends in Santa Barbara Basin are not always synchronous with other records in this region (Fig. 2). We posit that these instances do not present competing evidence, but rather that local factors are critical in determining local



865 climate. This is of critical importance for interpreting present and future climate change. This synthesis of climate  
and oceanographic processes and resultant impacts on ecosystems and human communities provides a window into  
understanding modern patterns of climate and climate change in the Western United States and Northeast Pacific  
and amplifies the need for future research investigating marine-terrestrial interactions, local and regional scale  
processes, and integrated physical-ecological-human systems.





## Appendices

### 870 Appendix A

Appendix A contains a list of papers used in the literature review (step 1 of systematic review). Abbreviations are as follows: Southwest – SW, Pacific Northwest – PNW.

| Paper                    | Paper                    | Latitude     | Longitude   | Region | Archive              |
|--------------------------|--------------------------|--------------|-------------|--------|----------------------|
| Addison et al., 2017     | Addison et al 2017       | 40.8656      | -124.573    | PNW    | Marine sediment      |
| Anderson and Byrd 1998   | Anderson and Byrd 1998   | 33.291667    | -117.341667 | SW     | Lake sediment        |
| Anderson et al., 2010    | Anderson et al., 2010    | 33.965278    | -120.097222 | SW     | Lake sediment        |
|                          | Anderson et al., 2010    | 33.955556    | -119.095833 | SW     | Marine sediment      |
| Asmerom et al., 2013     | Asmerom et al 2013       | 32.163745    | -104.517682 | SW     | Speleothem           |
| Bacon et al 2018         | Bacon et al 2018         | 36.542       | -117.938    | SW     | Geomorphology        |
| Bacon et al., 2006       | Bacon et al., 2006       | 36.441174    | -117.970433 | SW     | Lake sediment        |
| Barron and Anderson 2011 | Barron and Anderson 2011 | review paper |             |        |                      |
| Barron and Burky 2007    | Barron and Bukry, 2007   | 42.24        | -125.89     | PNW    | Marine sediment      |
|                          | Barron and Bukry, 2007   | 36.99        | -123.268    | SW     | Marine sediment      |
|                          | Barron and Bukry, 2007   | 41.68        | -124.93     | PNW    | Marine sediment      |
| Barron et al., 2003      | Barron et al 2003        | 42.682       | -124.93     | PNW    | Marine sediment      |
| Barron et al., 2010      | Barron et al., 2010      | 34.2875      | -120.036667 | SW     | Marine sediment      |
|                          | Barron et al., 2010      | 34.221667    | -120.028333 | SW     | Marine sediment      |
| Barron et al 2017        | Barron et al., 2017      | 40.9         | -124.6      | PNW    | Marine sediment      |
|                          | Barron et al., 2017      | 40.9         | -124.6      | PNW    | Marine sediment      |
| Barron et al., 2019      | Barron et al., 2019      | 37.3317      | -123.3992   | SW     | Marine sediment      |
| Beatty and Taylor 2009   | Beatty and Taylor 2009   | 39.034637    | -120.1624   | SW     | Lake sediment        |
| Beck et al 2018          | Beck et al 2018          | 42.730113    | -120.517458 | PNW    | Lake sediment        |
| Benson et al., 2002      | Benson et al 2002        | 40.073646    | -119.5969   | PNW    | Lake sediment        |
| Bird and Kirby 2006      | Bird & Kirby 2006        | 34.120426    | -116.82766  | SW     | Lake sediment        |
| Bird et al., 2010        | Bird et al., 2010        | 34.121045    | -116.828569 | SW     | Lake sediment        |
| Braje et al., 2012       | Braje et al 2012         | 34.038578    | -120.37907  | SW     | Archeological record |
|                          | Braje et al 2012         | 34.016987    | -119.765051 | SW     | Archeological record |
|                          | Braje et al 2012         | 33.955317    | -120.1062   | SW     | Archeological record |
| Briles et al., 2005      | Briles et al., 2005      | 42.025       | -123.458333 | PNW    | Lake sediment        |
| Brown and Hebda 2002     | Brown and Hebda 2002     | 48.595278    | -124.197325 | PNW    | Lake sediment        |

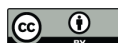

|                             |                             |                       |             |     |                      |
|-----------------------------|-----------------------------|-----------------------|-------------|-----|----------------------|
|                             | Brown and Hebda 2002        | 48.547796             | -123.475786 | PNW | Lake sediment        |
| Byrne et al., 2001          | Byrne et al., 2001          | 38.098287             | -122.02125  | SW  | Marine sediment      |
| Cannariato and Kennett 1999 | Cannariato and Kennett 1999 | 34.535                | -121.107167 | SW  | Marine sediment      |
|                             | Cannariato and Kennett 1999 | 34.5                  | -121.5      | SW  | Marine sediment      |
| Cole and Liu 1994           | Cole and Liu 1994           | 33.956389             | -119.976667 | SW  | Lake sediment        |
| Cole and Wahl 2000          | Cole and Wahl 2000          | 32.929595             | -117.256734 | SW  | Lake sediment        |
| Cook et al., 2000           | Cook et al., 2000           | review/modeling paper |             |     |                      |
| Cowart and Byrne 2013       | Cowart and Byrne 2013       | 37.173889             | -122.314444 | SW  | Lake sediment        |
| Davis 1992                  | Davis 1992                  | 33.660482             | -117.840775 | SW  | Marine sediment      |
|                             |                             |                       | -120.033333 |     |                      |
| Dingemans et al 2014        | Dingemans et al 2014        | 34.7666667            | 3           | SW  | Lake sediment        |
| Du et al 2018               | Du et al., 2018             | 34.281767             | -119.963967 | SW  | Marine sediment      |
| Erlandson et al., 2007      | Erlandson et al., 2007      |                       |             |     |                      |
| Erlandson et al., 2009      | Erlandson et al., 2009      |                       |             |     |                      |
| Feakins et al 2014          | Feakins et al 2014          | 34.777634             | -120.039859 | SW  | Lake sediment        |
| Field et al 2006            | Field et al., 2006          | 34.287133             | -120.035583 | SW  | Marine sediment      |
| Fisler and Hendy 2008       | Fisler and Hendy 2008       | 34.2875               | -120.036667 | SW  | Marine sediment      |
| Flores et al., 2017         | Flores et al., 2017         | 33.987079             | -120.222156 | SW  | Archeological record |
|                             | Flores et al., 2017         | 33.914652             | -120.053465 | SW  | Archeological record |
| Friddell et al 2003         | Friddell et al 2003         | 34.271167             | -120.072667 | SW  | Marine sediment      |
| Gardener et al., 1988       | Gardner et al., 1988        | 39.05                 | -122.835583 | SW  | Lake sediment        |
|                             | Gardner et al., 1988        | 38.425167             | -122.796167 | SW  | Marine sediment      |
| Gavin et al. 2007           | Gavin et al. 2007           | review paper          |             |     |                      |
| Gavin et al., 2003          | Gavin et al., 2003          | 49.3911               | -125.748781 | PNW | Tree stump           |
| Glassow et al., 2012        | Glassow et al., 2012        | 33.960648             | -119.817915 | SW  | Archeological record |
| Hallett and Anderson 2010   | Hallett and Anderson 2010   | 37.90857222           | -119.2864   | SW  | Lake sediment        |
|                             | Hallett and Anderson 2010   | 37.59570278           | -119.0067   | SW  | Lake sediment        |
|                             |                             |                       | -121.466667 |     |                      |
| Hallett et al., 2003        | Hallett et al., 2003        | 49.36                 | 7           | PNW | Lake sediment        |
|                             | Hallett et al., 2003        | 49.266667             | -121.516667 | PNW | Lake sediment        |
| Hermann et al 2018          | Hermann et al 2018          | review paper          |             |     |                      |
| Heusser 1978                | Heusser 1978                | 34.266667             | -120.066667 | SW  | Marine sediment      |



|                             |                             |                  |             |     |                 |
|-----------------------------|-----------------------------|------------------|-------------|-----|-----------------|
| Heusser 1983                | Heusser 1983                | 48.59065         | -123.503333 | PNW | Marine sediment |
| Heusser 1998                | Heusser 1998                | review paper     |             |     | Marine sediment |
| Hiner et al 2016            | Hiner et al 2016            | 36.231354        | -121.482348 | SW  | Lake sediment   |
| Ingram 1998                 | Ingram 1998                 | 37.576171        | -122.261235 | SW  | archeological   |
| Jones and Kennett 1999      | Jones and Kennett 1999      | 36.288439        | -121.853672 | SW  | archeological   |
|                             | Jones and Kennett 1999      | 35.642784        | -121.177744 | SW  | archeological   |
|                             | Jones and Kennett 1999      | 36.045231        | -121.584481 | SW  | archeological   |
|                             | Jones et al., 2008          | 35.668278        | -121.284271 | SW  | archeological   |
|                             | Jones et al., 2008          | 36.070611        | -121.582634 | SW  | archeological   |
| Kaufman et al., 2020        | Kaufman et al., 2020        | global synthesis |             |     |                 |
|                             | Kennett and Ingram 1995     | 34.2875          | -120.036667 | SW  | Marine sediment |
| Kennett and Kennett 2000    | Kennett and Kennett 2000    | 34.2875          | -120.036667 | SW  | Marine sediment |
| Kennett et al., 2007        | Kennett et al., 2007        | 34.2875          | -120.036667 | SW  | Marine sediment |
| Kim et al 2004              | Kim et al., 2004            | 48.912           | -126.89     | PNW | Marine sediment |
|                             | Kim et al., 2004            | 22.99            | -109.47     | SW  | Marine sediment |
|                             | Kim et al., 2004            | 34.535           | -121.107    | SW  | Marine sediment |
|                             | Kim et al., 2004            | 41.682           | -124.93     | PNW | Marine sediment |
| Kirby et al 2007            | Kirby et al 2007            | 33.37            | -117.22     | SW  | Lake sediment   |
| Kirby et al 2010            | Kirby et al 2010            | 33.37            | -117.22     | SW  | Lake sediment   |
| Kirby et al 2012            | Kirby et al 2012            | 34.253472        | -116.920249 | SW  | Lake sediment   |
| Kirby et al 2014            | Kirby et al 2014            | 34.77            | -120.1162   | SW  | Lake sediment   |
| Kirby et al 2015            | Kirby et al 2015            | 33.37            | -117.22     | SW  | Lake sediment   |
| Kirby et al 2019            | Kirby et al 2019            | 33.6733          | -117.3542   | SW  | Lake sediment   |
|                             | Kirby et al 2019            | 33.6734          | -117.3641   | SW  | Lake sediment   |
| Konrad and Clarke, 1998     | Konrad and Clarke 1998      | 37.970176        | -119.318354 | SW  | Lake sediment   |
|                             | Konrad and Clarke 1998      | 37.140252        | -118.629612 | SW  | Lake sediment   |
| Lightfoot and Cuthrell 2015 | Lightfoot and Cuthrell 2015 | 37.16305         | -122.338183 | SW  | archeological   |
| Lindstrom, 1990             | Lindstrom 1990              | 38.942579        | -120.053067 | SW  | Tree stump      |
| Long and Whitlock 1998      | Long and Whitlock 1998      | 44.167778        | -123.582222 | PNW | Lake sediment   |
| Lyle et al., 2012           | Lyle et al., 2012           | review paper     |             |     |                 |
| Macdonald and Case 2005     | Macdonald and Case 2005     | 34.066667        | -116.483333 | SW  | Tree ring       |
| MacDonald et al., 2016      | MacDonald et al 2016        | 38.3395          | -119.4984   | SW  | Lake sediment   |



|                            |                            |              |              |     |                 |
|----------------------------|----------------------------|--------------|--------------|-----|-----------------|
| Malamud-Roam et al 2006    | Malamud-Roam et al 2006    | 37.997233    | -122.453821  | SW  | Marine sediment |
| Marchitto et al 2010       | Marchitto et al., 2010     | 25.2         | -112.7       | SW  | Marine sediment |
| Marcott et al., 2013       | Marcott et al., 2013       | review paper |              |     |                 |
| Marlon et al., 2006        | Marlon et al. 2006         | 48.168       | -114.368     | PNW | Lake sediment   |
|                            | Marlon et al. 2006         | 44.288       | -110.178     | PNW | Lake sediment   |
|                            | Marlon et al. 2006         | 44.928       | -110.358     | PNW | Lake sediment   |
|                            | Marlon et al. 2006         | 44.668       | -110.628     | PNW | Lake sediment   |
|                            | Marlon et al. 2006         | 45.848       | -113.448     | PNW | Lake sediment   |
|                            | Marlon et al. 2006         | 45.898       | -114.268     | PNW | Lake sediment   |
|                            | Marlon et al. 2006         | 46.328       | -114.658     | PNW | Lake sediment   |
|                            | Marlon et al. 2006         | 45.708       | -114.998     | PNW | Lake sediment   |
|                            | Marlon et al. 2006         | 46.088       | -123.908     | PNW | Lake sediment   |
| Mayewski et al., 2004      | Mayewski et al., 2004      | review paper |              |     |                 |
| McGann 2008                | McGann 2008                | 37.6305      | -122.3665    | SW  | Marine sediment |
| McGann 2011                | McGann 2011                | 37.223333    | -123.243333  | SW  | Marine sediment |
| McGann 2015                | McGann 2015                | 36.392167    | -123.342     | SW  | Marine sediment |
| McQuiod and Hobson 2001    | McQuiod and Hobson 2001    | 48.633333    | -123.5       | PNW | Marine sediment |
| Mix et al., 1999           | Mix et al 1999             | 42.117       | -125.75      | PNW | Marine sediment |
|                            | Mix et al 1999             | 41.682       | -124.93      | PNW | Marine sediment |
| Moffitt et al., 2014       | Moffitt et al., 2014       | 34.37        | -121.13      | SW  | Marine sediment |
| Moffitt et al., 2015       | Moffitt et al., 2015       | 34.37        | -121.13      | SW  | Marine sediment |
| Mohr et al., 2000          | Mohr et al., 2000          | 41.4         | -122.583     | PNW | Lake sediment   |
|                            | Mohr et al., 2000          | 41.333       | -122.55      | PNW | Lake sediment   |
| Nederbragt and Thurow 2001 | Nederbragt and Thurow 2001 | 48.59065     | -123.503333  | PNW | Marine sediment |
|                            | Nederbragt and Thurow 2001 | 48.590617    | -123.503417  | PNW | Marine sediment |
| Negrini et al., 2006       | Negrini et al., 2006       | 36.004447    | -119.785517  | SW  | Lake sediment   |
| Oster et al., 2017         | Oster et al., 2017         | 37           | -122.1833333 | SW  | Speleothem      |
| Pellatt et al., 2001       | Pellatt et al., 2001       | 48.59065     | -123.503333  | PNW | Marine sediment |
| Platzman and Lund 2019     | Platzman and Lund 2019     | 35.3         | -120.05      | SW  | Lake sediment   |
| Rasmussen et al 2006       | Rasmussen et al 2006       | 32.159       | -104.523     | SW  | Speleothem      |
| Reyes and Clague, 2004     | Reyes and Clague 2004      | 50.75        | -123.766667  | PNW | Moraine         |



|                             |                             |                       |             |     |                      |
|-----------------------------|-----------------------------|-----------------------|-------------|-----|----------------------|
| Rick, 2011                  | Rick 2011                   | 34.003841             | -120.176931 | SW  | Archeological record |
| Roark et al 2003            | Roark et al 2003            | 34.2875               | -120.036667 | SW  | Marine sediment      |
| Schimmelmann et al., 2013   | Schimmelmann et al., 2013   | 34.2875               | -120.036667 | SW  | Marine sediment      |
| Shuman et al 2018           | Shuman et al 2018           | review paper          |             |     |                      |
| Spaulding et al 1991        | Spaulding 1990              | 35.45                 | -115.1      | SW  | Terrestrial midden   |
| Steinman et al., 2019       | Steinman et al 2019         | 48.5417               | -119.5818   | PNW | Lake sediment        |
|                             | Steinman et al 2019         | 48.5394               | -119.5615   | PNW | Lake sediment        |
| Steinman et al., 2016       | Steinman et al., 2016       | 50.82                 | -116.39     | PNW | Lake sediment        |
| Stine 1990                  | Stine 1990                  | 38.008101             | -119.016233 | SW  | Lake shore           |
| Stine 1994                  | Stine 1994                  | 37.950538             | -119.01395  | SW  | Tree stump           |
| Taylor et al. 2016          | Taylor et al. 2016          | 40.7                  | -121.59     | PNW | Fire scar            |
| Tomasovych and Kidwell 2017 | Tomasovych and Kidwell 2018 | 33.48                 | -118.59     | SW  | Marine sediment      |
|                             | Tomasovych and Kidwell 2018 | 32.7555               | -117.3617   | SW  | Marine sediment      |
| Tunncliffe et al 2001       | Tunncliffe et al 2001       | 48.59065              | -123.503333 | PNW | Marine sediment      |
|                             | Tunncliffe et al 2001       | 48.590617             | -123.503417 | PNW | Marine sediment      |
| van Geen et al 2003         | van Geen et al 2003         | 34.2875               | -120.036667 | SW  | Marine sediment      |
| Viau et al., 2006           | Viau et al., 2006           | review/modeling paper |             |     |                      |
| Walsh et al. 2017           | Walsh et al. 2017           | 46.9231               | -121.5836   | PNW | Lake sediment        |
|                             | Walsh et al. 2017           | 46.9198               | -121.5886   | PNW | Lake sediment        |
|                             | Walsh et al. 2017           | 46.9114               | -121.6571   | PNW | Lake sediment        |
| Whitlock et al 2008         | Whitlock et al 2008         | 41.21                 | -122.5      | PNW | Lake sediment        |
|                             | Whitlock et al 2008         | 41.35                 | -122.56     | PNW | Lake sediment        |
|                             | Whitlock et al 2008         | 41.4                  | -122.58     | PNW | Lake sediment        |
|                             | Whitlock et al 2008         | 42.02                 | -123.46     | PNW | Lake sediment        |
|                             | Whitlock et al 2008         | 45.81                 | -123.57     | PNW | Lake sediment        |
|                             | Whitlock et al 2008         | 44.16                 | -123.58     | PNW | Lake sediment        |
|                             | Whitlock et al 2008         | 46.08                 | -123.9      | PNW | Lake sediment        |



## 875 Appendix B

Appendix B includes the latitude, longitude, region, and proxy type of all studies used in the coded analysis of previously published records (step 2 of systematic review).

| Paper                       | Latitude     | Longitude  | Region | Archive              | Proxy Type(s)                                                     |
|-----------------------------|--------------|------------|--------|----------------------|-------------------------------------------------------------------|
| Addison et al., 2017        | 40.8656      | -124.573   | PNW    | Marine Sediment      | sedimentology, carbon and nitrogen isotopes                       |
| Anderson and Byrd 1998      | 33.291667    | -117.34167 | SW     | Lake Sediment        | pollen assemblage                                                 |
| Asmerom et al., 2013        | 32.163745    | -104.51768 | SW     | Speleothem           | sedimentology                                                     |
| Bacon et al 2018            | 36.542       | -117.938   | SW     | Geomorphology        | sedimentology                                                     |
| Bacon et al., 2006          | 36.441174    | -117.97043 | SW     | Lake Sediment        | diatom assemblage, silicoflagellate assemblage                    |
| Barron and Anderson 2011    | review paper |            |        |                      |                                                                   |
| Barron and Burky 2007       | 42.24        | -125.89    | PNW    | Marine Sediment      | diatom assemblage, pollen assemblages, alkenones, sedimentology   |
| Barron et al., 2017         | 40.9         | -124.6     | PNW    | Marine Sediment      | diatom assemblage, silicoflagellate assemblage                    |
| Barron et al., 2003         | 42.682       | -124.93    | PNW    | Marine Sediment      | diatom assemblage, silicoflagellate assemblage, pollen assemblage |
| Barron et al., 2010         | 34.2875      | -120.03667 | SW     | Marine Sediment      |                                                                   |
| Barron et al., 2019         | 37.3317      | -123.3992  | SW     | Marine Sediment      |                                                                   |
| Beatty and Taylor 2009      | 39.034637    | -120.1624  | SW     | Lake Sediment        | charcoal                                                          |
| Beck et al 2018             | 42.730113    | -120.51746 | PNW    | Lake Sediment        | pollen assemblage, oxygen isotopes                                |
| Benson et al., 2002         | 40.073646    | -119.5969  | PNW    | Lake Sediment        | sedimentology, pollen assemblages                                 |
| Bird and Kirby 2006         | 34.120426    | -116.82766 | SW     | Lake Sediment        | sedimentology, ground penetrating radar                           |
| Bird et al., 2010           | 34.121045    | -116.82857 | SW     | Lake Sediment        | sedimentology                                                     |
| Braje et al., 2012          | 34.038578    | -120.37907 | SW     | Archeological record | shell assemblage, plant microfossils, charcoal                    |
| Briles et al., 2005         | 42.025       | -123.45833 | PNW    | Lake Sediment        | pollen assemblage, charcoal                                       |
| Brown and Hebda 2002        | 48.595278    | -124.19733 | PNW    | Lake Sediment        | pollen assemblage, pollen assemblages, carbon isotopes            |
| Byrne et al., 2001          | 38.098287    | -122.02125 | SW     | Marine Sediment      | diatom assemblage                                                 |
| Cannariato and Kennett 1999 | 34.535       | -121.10717 | SW     | Marine Sediment      | foraminiferal assemblage, sedimentology                           |
| Cole and Liu 1994           | 33.956389    | -119.97667 | SW     | Lake Sediment        | pollen assemblage, sedimentology, charcoal                        |



|                            |                 |            |     |                    |                                                                        |
|----------------------------|-----------------|------------|-----|--------------------|------------------------------------------------------------------------|
| Cole and Wahl 2000         | 32.929595       | -117.25673 | SW  | Lake Sediment      | pollen assemblage, charcoal                                            |
| Du et al 2018              | 34.281767       | -119.96397 | SW  | Marine Sediment    | sedimentology                                                          |
| Fisler and Hendy 2008      | 34.2875         | -120.03667 | SW  | Marine Sediment    | foraminiferal assemblage                                               |
| Friddell et al 2003        | 34.271167       | -120.07267 | SW  | Marine Sediment    | oxygen isotopes                                                        |
| Hallett and Anderson 2010  | 37.9085722<br>2 | -119.2864  | SW  | Lake Sediment      | charcoal, pollen assemblages                                           |
| Hallett et al., 2003       | 49.36           | -121.46667 | PNW | Lake Sediment      | charcoal                                                               |
| Kennett et al., 2007       | 34.2875         | -120.03667 | SW  | Marine Sediment    | foraminiferal assemblage, radiocarbon, sedimentology                   |
| Kirby et al 2007           | 33.37           | -117.22    | SW  | Lake Sediment      | pollen assemblage, sedimentology                                       |
| Kirby et al 2010           | 33.37           | -117.22    | SW  | Lake Sediment      | sedimentology                                                          |
| Kirby et al 2014           | 34.77           | -120.1162  | SW  | Lake Sediment      | sedimentology, hydrogen isotopes                                       |
| Kirby et al 2015           | 33.37           | -117.22    | SW  | Lake Sediment      | sedimentology, hydrogen isotopes                                       |
| Kirby et al 2019           | 33.6733         | -117.3542  | SW  | Lake Sediment      | sedimentology                                                          |
| Konrad and Clarke, 1998    | 37.970176       | -119.31835 | SW  | Lake Sediment      | lichenometry                                                           |
| Lindstrom, 1990            | 38.942579       | -120.05307 | SW  | Tree stump         | tree stumps                                                            |
| Long and Whitlock 1998     | 44.167778       | -123.58222 | PNW | Lake Sediment      | charcoal, sedimentology                                                |
| MacDonald et al., 2016     | 38.3395         | -119.4984  | SW  | Lake Sediment      | sedimentology, carbon and nitrogen isotopes, charcoal, pollen analysis |
| Malamud-Roam et al 2006    | 37.997233       | -122.45382 | SW  | Marine Sediment    | review                                                                 |
| Marchitto et al 2010       | 25.2            | -112.7     | SW  | Marine Sediment    | magnesium/calcium foraminifera                                         |
| Marlon et al., 2006        | 48.168          | -114.368   | PNW | Lake Sediment      | charcoal                                                               |
| McGann 2011                | 37.223333       | -123.24333 | SW  | Marine Sediment    | foraminiferal assemblage, sedimentology, oxygen and carbon isotopes    |
| McGann 2015                | 36.392167       | -123.342   | SW  | Marine Sediment    | pollen assemblage                                                      |
| Mix et al., 1999           | 42.117          | -125.75    | PNW | Marine Sediment    | oxygen isotopes, foraminiferal assemblage                              |
| Mohr et al., 2000          | 41.4            | -122.583   | PNW | Lake Sediment      | charcoal, pollen assemblages                                           |
| Nederbragt and Thurow 2001 | 48.59065        | -123.50333 | PNW | Marine Sediment    | sedimentology                                                          |
| Pellatt et al., 2001       | 48.59065        | -123.50333 | PNW | Marine Sediment    | oxygen isotopes, trace elements                                        |
| Spaulding et al 1991       | 35.45           | -115.1     | SW  | Terrestrial Midden | oxygen and carbon isotopes, sedimentology                              |
| Steinman et al., 2019      | 48.5417         | -119.5818  | PNW | Lake Sediment      | oxygen isotopes                                                        |



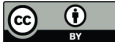

|                     |       |         |     |               |          |
|---------------------|-------|---------|-----|---------------|----------|
| Whitlock et al 2008 | 44.28 | -110.17 | PNW | Lake Sediment | charcoal |
|---------------------|-------|---------|-----|---------------|----------|



## 880 Appendix C

Appendix C shows the results of coded analysis of previously published records (step 2 of systematic review).

| Paper                  | Latitude  | Longitude  | Region | Early Fire | Early Temp | Early Hydro | Mid Fire | Mid Temp | Mid Hydro | Late Fire | Late Temp | Late Hydro |
|------------------------|-----------|------------|--------|------------|------------|-------------|----------|----------|-----------|-----------|-----------|------------|
| Addison et al 2017     | 40.8656   | -124.573   | PNW    |            |            | dry         |          |          |           |           |           |            |
| Anderson and Byrd 1998 | 33.291667 | -117.34167 | SW     |            |            | dry         |          |          | wet       |           |           |            |
| Asmerom et al 2013     | 32.163745 | -104.51768 | SW     |            |            | dry         |          |          |           |           |           |            |
| Bacon et al 2018       | 36.542    | -117.938   | SW     |            |            | dry         |          |          |           |           |           |            |
| Bacon et al., 2006     | 36.441174 | -117.97043 | SW     |            |            | dry         |          |          |           |           |           |            |
| Barron and Bukry, 2007 | 42.24     | -125.89    | PNW    |            | warm       | dry         |          | cold     |           |           |           |            |
| Barron et al., 2017    | 40.9      | -124.6     | PNW    |            |            | dry         |          | cold     |           |           | warm      | wet        |
| Barron et al., 2003    | 42.682    | -124.93    | PNW    |            | warm       | dry         |          | cold     |           |           | warm      | wet        |
| Barron et al., 2010    | 34.2875   | -120.03667 | SW     |            |            | dry         |          |          |           |           |           |            |
| Barron et al., 2019    | 37.3317   | -123.3992  | SW     |            | warm       | dry         |          | cold     |           |           | warm      | wet        |
| Beatty and Taylor 2009 | 39.034637 | -120.1624  | SW     | low        |            |             | high     |          |           | low       | cold      | dry        |
| Beck et al 2018        | 42.730113 | -120.51746 | PNW    |            |            | wet         |          |          |           |           |           |            |
| Benson et al 2002      | 40.073646 | -119.5969  | PNW    |            |            | wet         |          | warm     | dry       |           |           | wet        |
| Bird & Kirby 2006      | 34.120426 | -116.82766 | SW     |            |            | wet         |          |          |           |           |           |            |
| Bird et al., 2010      | 34.121045 | -116.82857 | SW     |            |            | wet         |          |          |           |           |           |            |
| Braje et al 2012       | 34.038578 | -120.37907 | SW     |            |            | wet         |          |          |           |           |           |            |
| Briles et al., 2005    | 42.025    | -123.45833 | PNW    |            | warm       | wet         |          |          |           | high      | cold      | dry        |
| Brown and Hebda 2002   | 48.595278 | -124.19733 | PNW    |            | high       | wet         | low      |          |           | low/high  | cold      | dry        |



| Paper                       | Latitude    | Longitude  | Region | Early Fire | Early Temp | Early Hydro | Mid Fire | Mid Temp | Mid Hydro | Late Fire | Late Temp | Late Hydro |
|-----------------------------|-------------|------------|--------|------------|------------|-------------|----------|----------|-----------|-----------|-----------|------------|
| Byrne et al., 2001          | 38.098287   | -122.02125 | SW     |            |            | wet         |          |          |           |           |           |            |
| Cannariato and Kennett 1999 | 34.535      | -121.10717 | SW     |            |            | wet         |          |          |           |           |           |            |
| Cole and Liu 1994           | 33.956389   | -119.97667 | SW     |            |            | wet         |          |          | dry       |           |           | wet        |
| Cole and Wahl 2000          | 32.929595   | -117.25673 | SW     |            |            | wet         |          |          |           |           |           |            |
| Du et al., 2018             | 34.281767   | -119.96397 | SW     |            |            |             |          |          | wet       |           |           |            |
| Fisler and Hendy 2008       | 34.2875     | -120.03667 | SW     |            | cold       |             |          | warm     |           |           |           | wet        |
| Friddell et al 2003         | 34.271167   | -120.07267 | SW     |            | cold       |             |          | warm     |           |           |           | wet        |
| Hallett and Anderson 2010   | 37.90857222 | -119.2864  | SW     | low        |            |             | high     | warm     | dry       | high      | cold      | dry        |
| Hallett et al., 2003        | 49.36       | -121.46667 | PNW    | high       | warm       |             |          |          | wet       |           | cold      | dry        |
| Kennett et al., 2007        | 34.2875     | -120.03667 | SW     |            |            |             |          | warm     | dry       |           |           | wet        |
| Kirby et al 2007            | 33.37       | -117.22    | SW     |            |            |             |          |          | dry       |           |           | wet        |
| Kirby et al 2010            | 33.37       | -117.22    | SW     |            |            |             |          |          | dry       |           |           | wet        |
| Kirby et al 2014            | 34.77       | -120.1162  | SW     |            |            |             |          |          | dry       |           |           | wet        |
| Kirby et al 2015            | 33.37       | -117.22    | SW     |            |            |             |          |          | dry       |           |           |            |
| Kirby et al 2019            | 33.6733     | -117.3542  | SW     |            |            |             |          |          | wet       |           |           |            |
| Konrad and Clarke 1998      | 37.970176   | -119.31835 | SW     |            |            |             |          |          | wet       |           |           |            |
| Lindstrom 1990              | 38.942579   | -120.05307 | SW     |            |            |             |          |          | dry       |           |           |            |

885

890



| Paper                      | Latitude  | Longitude  | Region | Early Fire | Early Temp | Early Hydro | Mid Fire | Mid Temp | Mid Hydro | Late Fire | Late Temp | Late Hydro |
|----------------------------|-----------|------------|--------|------------|------------|-------------|----------|----------|-----------|-----------|-----------|------------|
| Long and Whitlock 1998     | 44.167778 | -123.58222 | PNW    | high       | warm       |             | low      | cold     | wet       | low       | cold      | dry        |
| MacDonald et al 2016       | 38.3395   | -119.4984  | SW     |            |            |             |          | warm     | dry       |           |           | wet        |
| Malamud-Roam et al 2006    | 37.997233 | -122.45382 | SW     |            |            |             |          | cold     | wet       |           | cold      |            |
| Marchitto et al., 2010     | 25.2      | -112.7     | SW     |            | cold       |             |          | cold     |           |           |           |            |
| Marlon et al. 2006         | 48.168    | -114.368   | PNW    | low        | warm       |             | high     | cold     | wet       | high      | cold      | dry        |
| McGann 2011                | 37.223333 | -123.24333 | SW     |            | warm       |             |          | warm     | dry       |           | warm      | wet        |
| McGann 2015                | 36.392167 | -123.342   | SW     |            | warm       |             |          |          | dry       |           |           | wet        |
| Mix et al 1999             | 42.117    | -125.75    | PNW    |            | warm       |             |          | cold     |           |           | warm      | wet        |
| Mohr et al., 2000          | 41.4      | -122.583   | PNW    | low        | warm       |             | high     | cold     | wet       | high      | cold      | dry        |
| Nederbragt and Thurow 2001 | 48.59065  | -123.50333 | PNW    |            |            |             |          |          | wet       |           |           |            |
| Pellatt et al., 2001       | 48.59065  | -123.50333 | PNW    |            | warm       |             |          |          |           |           |           |            |
| Spaulding 1990             | 35.45     | -115.1     | SW     |            |            |             |          |          | dry       |           |           |            |
| Steinman et al 2019        | 48.5417   | -119.5818  | PNW    |            |            |             |          |          | wet       | high      | cold      | dry        |
| Whitlock et al 2008        | 44.28     | -110.17    | PNW    | low        |            |             |          | cold     | wet       | high      | cold      | dry        |



## Appendix D

Appendix D contains the data accessed for time series plots (Figs. 4, 5).

| Paper                  | Latitude  | Longitude   | Region | Archive               | Figure Number | Accessed From              | Link                                                                                                                                                                                                                                                                                                                                                                  |
|------------------------|-----------|-------------|--------|-----------------------|---------------|----------------------------|-----------------------------------------------------------------------------------------------------------------------------------------------------------------------------------------------------------------------------------------------------------------------------------------------------------------------------------------------------------------------|
| Addisson et al 2017    | 40.8656   | -124.573    | PNW    | Marine sediment       | 4             | NOAA Paleoclimate Database | <a href="https://www.ncdc.noaa.gov/paleo-search/study/21650">https://www.ncdc.noaa.gov/paleo-search/study/21650</a>                                                                                                                                                                                                                                                   |
| Barron et al 2003      | 42.682    | -124.93     | PNW    | Marine sediment       | 4             | NOAA Paleoclimate Database | <a href="https://www.ncdc.noaa.gov/paleo-search/study/5867">https://www.ncdc.noaa.gov/paleo-search/study/5867</a>                                                                                                                                                                                                                                                     |
| Braje et al 2012       | 34.038578 | -120.37907  | SW     | Archaeological Record | 5             | In original paper: Table 1 | <a href="https://www.sciencedirect.com/science/article/abs/pii/S1040618211005301">https://www.sciencedirect.com/science/article/abs/pii/S1040618211005301</a>                                                                                                                                                                                                         |
| Kennett et al., 2007   | 34.2875   | -120.036667 | SW     | Marine sediment       | 5             | Author webpage             | <a href="http://php.scripts.psu.edu/dept/liberalarts/sites/kennett/data.php">http://php.scripts.psu.edu/dept/liberalarts/sites/kennett/data.php</a>                                                                                                                                                                                                                   |
| Kirby et al 2015       | 33.37     | -117.22     | SW     | Lake sediment         | 5             | NOAA Paleoclimate Database | <a href="https://www.ncdc.noaa.gov/paleo-search/study/20106">https://www.ncdc.noaa.gov/paleo-search/study/20106</a>                                                                                                                                                                                                                                                   |
| Long and Whitlock 1998 | 44.167778 | -123.582222 | PNW    | Lake sediment         | 4             | NOAA Paleoclimate Database | <a href="https://www.ncdc.noaa.gov/paleo-search/study/2252">https://www.ncdc.noaa.gov/paleo-search/study/2252</a>                                                                                                                                                                                                                                                     |
| MacDonald et al 2016   | 38.3395   | -119.4984   | SW     | Lake sediment         | 5             | Harvard Dataverse          | <a href="https://dataverse.harvard.edu/dataset.xhtml?persistentId=doi:10.7910/DVN/P3MCFX">https://dataverse.harvard.edu/dataset.xhtml?persistentId=doi:10.7910/DVN/P3MCFX</a>                                                                                                                                                                                         |
| McGann 2015            | 36.392167 | -123.342    | SW     | Marine sediment       | 5             | In original paper: Table 2 | <a href="https://www.sciencedirect.com/science/article/pii/S1040618215000610?casa_token=PAo4SBfUSPMAAAAA:g2YzlQACCS_MKrtKGcIN8PbTF0vc44mFxqyNfO_l0jeGltRavFpodrSo1aT7mUaM_KuPUM3aupM">https://www.sciencedirect.com/science/article/pii/S1040618215000610?casa_token=PAo4SBfUSPMAAAAA:g2YzlQACCS_MKrtKGcIN8PbTF0vc44mFxqyNfO_l0jeGltRavFpodrSo1aT7mUaM_KuPUM3aupM</a> |
| Steinman et al 2016    | 50.82     | -116.39     | PNW    | Lake sediment         | 4             | NOAA Paleoclimate Database | <a href="https://www.ncdc.noaa.gov/paleo-search/study/21250">https://www.ncdc.noaa.gov/paleo-search/study/21250</a>                                                                                                                                                                                                                                                   |



### Data Availability

Data generated for this manuscript is included in the Appendices.

900

### Author Contributions

HMP and TMH conceptualized and designed the project. All authors completed data curation and literature review. HMP conducted data analysis and wrote the manuscript. All authors contributed to editing of the manuscript.

### 905 Competing Interests

The authors declare that they have no conflict of interest.

### Acknowledgements

We acknowledge National Science Foundation SF support to T. Hill (NSF OCE 1832812), and the UC Davis  
910 Dissertation Year Fellowship for support to H. Palmer. We acknowledge all members of the UC Davis Geology  
Oceans and Climate Change Course (GEL 232) in Spring 2018 for their contributions to initial data gathering and  
framing of this project. Finally, we acknowledge that this paper includes histories and discussion of Indigenous  
peoples of Western North America (Turtle Island) who have stewarded the land and sea for millennia. We aim to  
document the broad histories of interactions between people and environment, but we acknowledge that this record  
915 is incomplete due to the erasure of Indigenous histories and oral traditions, genocide of knowledge keepers, and  
destruction of cultural artifacts. We acknowledge the keepers of intergenerational Indigenous knowledge who  
maintain stories and data of the human, ecosystem, and climate impacts of settler colonization described here. We  
do not attempt to name all tribes whose ancestral and present homelands make up this study area, but we  
acknowledge that the majority of the geographic area covered here represents unceded land of Indigenous tribes and  
920 that data used here from previously published studies may have been acquired without consent from Indigenous  
peoples. We direct readers to the open-source resource: [nativelands.ca](http://nativelands.ca) to identify the homelands of the diverse  
Indigenous people of this region and encourage readers to use this resource as a starting place to learn about the land  
and marine stewardship of Indigenous peoples past and present.

925





## References

- Adams, D. K. and Comrie, A. C.: The North American Monsoon, 78, 2197–2214, [https://doi.org/10.1175/1520-0477\(1997\)078<2197:TNAM>2.0.CO;2](https://doi.org/10.1175/1520-0477(1997)078<2197:TNAM>2.0.CO;2), 1997.
- 930 Addison, J. A., Barron, J., Finney, B., Kusler, J., Bukry, D., Heusser, L. E., and Alexander, C. R.: A Holocene record of ocean productivity and upwelling from the northern California continental slope, *Quatern Int.*, 2017.
- Ainsworth, C. H., Samhouri, J. F., Busch, D. S., Cheung, W. W. L., Dunne, J., and Okey, T. A.: Potential impacts of climate change on Northeast Pacific marine foodwebs and fisheries, *ICES Journal of Marine Science*, 68, 1217–1229, <https://doi.org/10.1093/icesjms/fsr043>, 2011.
- 935 Amante, C. and Eakins, B. E.: ETOPO1 1 ARC-MINUTE GLOBAL RELIEF MODEL: PROCEDURES, DATA SOURCES AND ANALYSIS, 25, 2009.
- Anderson, R. S. and Byrd, B. F.: LATE-HOLOCENE VEGETATION CHANGES FROM THE LAS FLORES CREEK COASTAL LOWLANDS, SAN DIEGO COUNTY, CALIFORNIA, 45, 171–182, 1998.
- 940 Anderson, R. S., Starratt, S., Jass, R. M. B., and Pinter, N.: Fire and vegetation history on Santa Rosa Island, Channel Islands, and long-term environmental change in southern California, 25, 782–797, <https://doi.org/10.1002/jqs.1358>, 2010.
- Anderson, R. S., Ejarque, A., Brown, P. M., and Hallett, D. J.: Holocene and historical vegetation change and fire history on the north-central coast of California, USA, *The Holocene*, 23, 1797–1810, <https://doi.org/10.1177/0959683613505344>, 2013.
- 945 Asmerom, Y., Polyak, V. J., Rasmussen, J. B. T., Burns, S. J., and Lachniet, M.: Multidecadal to multicentury scale collapses of Northern Hemisphere monsoons over the past millennium, *Proceedings of the National Academy of Sciences*, 110, 9651–9656, <https://doi.org/10.1073/pnas.1214870110>, 2013.
- Atwood, A. R., Wu, E., Frierson, D. M. W., Battisti, D. S., and Sachs, J. P.: Quantifying Climate Forcings and Feedbacks over the Last Millennium in the CMIP5–PMIP3 Models\*, 29, 1161–1178, <https://doi.org/10.1175/JCLI-D-15-0063.1>, 2016.
- 950 Bacon, S. N., Burke, R. M., Pezzopane, S. K., and Jayko, A. S.: Last glacial maximum and Holocene lake levels of Owens Lake, eastern California, USA, *Quaternary Science Reviews*, 25, 1264–1282, <https://doi.org/10.1016/j.quascirev.2005.10.014>, 2006.
- 955 Bacon, S. N., Lancaster, N., Stine, S., Rhodes, E. J., and McCarley Holder, G. A.: A continuous 4000-year lake-level record of Owens Lake, south-central Sierra Nevada, California, USA, *Quat. res.*, 90, 276–302, <https://doi.org/10.1017/qua.2018.50>, 2018.
- Bader, J., Jungclauss, J., Krivova, N., Lorenz, S., Maycock, A., Raddatz, T., Schmidt, H., Toohey, M., Wu, C.-J., and Claussen, M.: Global temperature modes shed light on the Holocene temperature conundrum, 11, 4726, <https://doi.org/10.1038/s41467-020-18478-6>, 2020.
- 960 Balestra, B., Krupinski, N. B. Q., Erohina, T., Fessenden-Rahn, J., Rahn, T., and Paytan, A.: Bottom-water oxygenation and environmental change in Santa Monica Basin, Southern California during the last 23 kyr, 490, 17–37, 2018.
- Barlow, M., Nigam, S., and Berbery, E. H.: Evolution of the North American Monsoon System, 11, 2238–2257, [https://doi.org/10.1175/1520-0442\(1998\)011<2238:EOTNAM>2.0.CO;2](https://doi.org/10.1175/1520-0442(1998)011<2238:EOTNAM>2.0.CO;2), 1998.
- 965 Barnosky, A. D., Hadly, E. A., Gonzalez, P., Head, J., Polly, P. D., Lawing, A. M., Eronen, J. T., Ackerly, D. D., Alex, K., Biber, E., Blois, J., Brashares, J., Ceballos, G., Davis, E., Dietl, G. P., Dirzo, R., Doremus, H.,



- 970 Fortelius, M., Greene, H. W., Hellmann, J., Hickler, T., Jackson, S. T., Kemp, M., Koch, P. L., Kremen, C., Lindsey, E. L., Looy, C., Marshall, C. R., Mendenhall, C., Mulch, A., Mychajliw, A. M., Nowak, C., Ramakrishnan, U., Schnitzler, J., Das Shrestha, K., Solari, K., Stegner, L., Stegner, M. A., Stenseth, N. C., Wake, M. H., and Zhang, Z. B.: Merging paleobiology with conservation biology to guide the future of terrestrial ecosystems, 355, 594–+, <https://doi.org/10.1126/science.aah4787>, 2017.
- Barron, J. A. and Anderson, L.: Enhanced Late Holocene ENSO/PDO expression along the margins of the eastern North Pacific, *Quaternary International*, 235, 3–12, <https://doi.org/10.1016/j.quaint.2010.02.026>, 2011.
- 975 Barron, J. A. and Bukry, D.: Development of the California Current during the past 12,000 yr based on diatoms and silicoflagellates, *Palaeogeography, Palaeoclimatology, Palaeoecology*, 248, 313–338, <https://doi.org/10.1016/j.palaeo.2006.12.009>, 2007a.
- Barron, J. A. and Bukry, D.: Solar forcing of Gulf of California climate during the past 2000 yr suggested by diatoms and silicoflagellates, *Marine Micropaleontology*, 62, 115–139, <https://doi.org/10.1016/j.marmicro.2006.08.003>, 2007b.
- 980 Barron, J. A., Heusser, L., Herbert, T., and Lyle, M.: High-resolution climatic evolution of coastal northern California during the past 16,000 years, *Paleoceanography*, 18, 2003a.
- Barron, J. A., Heusser, L., Herbert, T., and Lyle, M.: High-resolution climatic evolution of coastal northern California during the past 16,000 years: CLIMATIC EVOLUTION OF COASTAL CALIFORNIA, *Paleoceanography*, 18, n/a–n/a, <https://doi.org/10.1029/2002PA000768>, 2003b.
- 985 Barron, J. A., Bukry, D., and Field, D.: Santa Barbara Basin diatom and silicoflagellate response to global climate anomalies during the past 2200 years, *Quaternary International*, 215, 34–44, <https://doi.org/10.1016/j.quaint.2008.08.007>, 2010.
- Barron, J. A., Bukry, D., Heusser, L. E., Addison, J. A., and Alexander, C. R.: High-resolution climate of the past~7300 years of coastal northernmost California: Results from diatoms, silicoflagellates, and pollen, *Quatern Int*, 2017.
- 990 Barron, J. A., Addison, J. A., Heusser, L. E., Bukry, D., Schwartz, V., and Wagner, A.: An 11,300 yr record of paleoclimatology and paleoceanography of the central California coast in a gravity core from Pioneer Seamount, *Quaternary International*, <https://doi.org/10.1016/j.quaint.2019.12.019>, 2019.
- 995 Batchelder, H. P. and Powell, T. M.: Physical and biological conditions and processes in the northeast Pacific Ocean, *Progress in Oceanography*, 53, 105–114, [https://doi.org/10.1016/S0079-6611\(02\)00026-5](https://doi.org/10.1016/S0079-6611(02)00026-5), 2002.
- Beaty, R. M. and Taylor, A. H.: A 14 000 year sedimentary charcoal record of fire from the northern Sierra Nevada, Lake Tahoe Basin, California, USA, *The Holocene*, 19, 347–358, <https://doi.org/10.1177/0959683608101386>, 2009.
- 1000 Becerra-Valdivia, L. and Higham, T.: The timing and effect of the earliest human arrivals in North America, 584, 93–97, <https://doi.org/10.1038/s41586-020-2491-6>, 2020.
- Beck, C. W., Bryant, V. M., and Jenkins, D. L.: Analysis of Younger Dryas–Early Holocene pollen in sediments of Paisley Cave 2, south-central Oregon, *Palynology*, 42, 168–179, <https://doi.org/10.1080/01916122.2017.1319883>, 2018.
- 1005 Benson, L., Kashgarian, M., Rye, R., Lund, S., Paillet, F., Smoot, J., Kester, C., Mensing, S., Meko, D., and Lindström, S.: Holocene multidecadal and multicentennial droughts affecting Northern California and Nevada, *Quaternary Science Reviews*, 21, 659–682, [https://doi.org/10.1016/S0277-3791\(01\)00048-8](https://doi.org/10.1016/S0277-3791(01)00048-8), 2002.



- Bird, B. W. and Kirby, M. E.: An Alpine Lacustrine Record of Early Holocene North American Monsoon Dynamics from Dry Lake, Southern California (USA), *J Paleolimnol*, 35, 179–192, <https://doi.org/10.1007/s10933-005-8514-3>, 2006.
- 1010 Bird, B. W., Kirby, M. E., Howat, I. M., and Tulaczyk, S.: Geophysical evidence for Holocene lake-level change in southern California (Dry Lake), 39, 131–144, <https://doi.org/10.1111/j.1502-3885.2009.00114.x>, 2010.
- Bradley, R. S.: Climate Forcing During the Holocene, *PAGES news*, 11, 18–19, <https://doi.org/10.22498/pages.11.2-3.18>, 2003.
- 1015 Braje, T. J., Rick, T. C., and Erlandson, J. M.: A trans-Holocene historical ecological record of shellfish harvesting on California's Northern Channel Islands, 264, 109–120, 2012.
- Bray, N. A., Keyes, A., and Morawitz, W. M. L.: The California Current system in the Southern California Bight and the Santa Barbara Channel, 104, 7695–7714, <https://doi.org/10.1029/1998JC900038>, 1999.
- Briles, C. E., Whitlock, C., and Bartlein, P. J.: Postglacial vegetation, fire, and climate history of the Siskiyou Mountains, Oregon, USA, *Quat. res.*, 64, 44–56, <https://doi.org/10.1016/j.yqres.2005.03.001>, 2005.
- 1020 Brown, K. J. and Hebda, R. J.: Origin, development, and dynamics of coastal temperate conifer rainforests of southern Vancouver Island, Canada, *Can. J. For. Res.*, 32, 353–372, <https://doi.org/10.1139/x01-197>, 2002.
- Byrne, R., Ingram, B. L., Starratt, S., Malamud-Roam, F., Collins, J. N., and Conrad, M. E.: Carbon-Isotope, Diatom, and Pollen Evidence for Late Holocene Salinity Change in a Brackish Marsh in the San Francisco Estuary, *Quaternary Research*, 55, 66–76, <https://doi.org/10.1006/qres.2000.2199>, 2001.
- 1025 Cannariato, K. G. and Kennett, J. P.: Climatically related millennial-scale fluctuations in strength of California margin oxygen-minimum zone during the past 60 k.y., *Geology*, 27, 975–978, [https://doi.org/10.1130/0091-7613\(1999\)027<0975:Crmsfi>2.3.Co;2](https://doi.org/10.1130/0091-7613(1999)027<0975:Crmsfi>2.3.Co;2), 1999.
- Chavez, F., Ryan, J., Lluch-Cota, S., and Niquen, M.: From Anchovies to Sardines and Back: multidecadal CHANGE in the Pacific Ocean, *Science (New York, N.Y.)*, 299, 217–21, <https://doi.org/10.1126/science.1075880>, 2003.
- 1030 Checkley, D. M. and Barth, J. A.: Patterns and processes in the California Current System, *Prog Oceanogr*, 83, 49–64, <https://doi.org/10.1016/j.pocean.2009.07.028>, 2009.
- Chelton, D., Bernal, P., and McGowan, J.: Large-scale interannual physical and biological interaction in the California Current ( El Nino)., *Journal of Marine Research*, 40, 1982.
- 1035 Christensen, C. J., Gorsline, D. S., Hammond, D. E., and Lund, S. P.: Non-annual laminations and expansion of anoxic basin-floor conditions in Santa Monica Basin, California Borderland, over the past four centuries, *Mar Geol*, 116, 399–418, 1994.
- Clark, P. U., Dyke, A. S., Shakun, J. D., Carlson, A. E., Clark, J., Wohlfarth, B., Mitrovica, J. X., Hostetler, S. W., and McCabe, A. M.: The Last Glacial Maximum, *Science*, 325, 710–714, <https://doi.org/10.1126/science.1172873>, 2009.
- 1040 Clark, P. U., Shakun, J. D., Baker, P. A., Bartlein, P. J., Brewer, S., Brook, E., Carlson, A. E., Cheng, H., Kaufman, D. S., Liu, Z., Marchitto, T. M., Mix, A. C., Morrill, C., Otto-Bliesner, B. L., Pahnke, K., Russell, J. M., Whitlock, C., Adkins, J. F., Blois, J. L., Clark, J., Colman, S. M., Curry, W. B., Flower, B. P., He, F., Johnson, T. C., Lynch-Stieglitz, J., Markgraf, V., McManus, J., Mitrovica, J. X., Moreno, P. I., and Williams, J. W.: Global climate evolution during the last deglaciation, *Proceedings of the National Academy of Sciences*, 109, E1134–E1142, <https://doi.org/10.1073/pnas.1116619109>, 2012.
- 1045



- Cole, K. L. and Wahl, E.: A Late Holocene Paleoecological Record from Torrey Pines State Reserve, California, *Quaternary Research*, 53, 341–351, <https://doi.org/10.1006/qres.1999.2121>, 2000.
- 1050 Cook, E. R.: Long-Term Aridity Changes in the Western United States, *Science*, 306, 1015–1018, <https://doi.org/10.1126/science.1102586>, 2004.
- Cowart, A. and Byrne, R.: A Paleolimnological Record of Late Holocene Vegetation Change from the Central California Coast, *California Archaeology*, 5, 337–352, <https://doi.org/10.1179/1947461X13Z.00000000018>, 2013.
- 1055 Crowley, T. J.: Causes of Climate Change Over the Past 1000 Years, 289, 270–277, <https://doi.org/10.1126/science.289.5477.270>, 2000.
- Davis, O. K.: Rapid Climatic Change in Coastal Southern California Inferred from Pollen Analysis of San Joaquin Marsh, *Quat. res.*, 37, 89–100, [https://doi.org/10.1016/0033-5894\(92\)90008-7](https://doi.org/10.1016/0033-5894(92)90008-7), 1992.
- deMenocal, P. B.: Cultural Responses to Climate Change During the Late Holocene, 292, 667–673, <https://doi.org/10.1126/science.1059827>, 2001.
- 1060 Dennison, P. E., Brewer, S. C., Arnold, J. D., and Moritz, M. A.: Large wildfire trends in the western United States, 1984–2011, 41, 2928–2933, <https://doi.org/10.1002/2014GL059576>, 2014.
- Di Lorenzo, E., Schneider, N., Cobb, K. M., Franks, P. J. S., Chhak, K., Miller, A. J., McWilliams, J. C., Bograd, S. J., Arango, H., Curchitser, E., Powell, T. M., and Rivière, P.: North Pacific Gyre Oscillation links ocean climate and ecosystem change, *Geophys. Res. Lett.*, 35, L08607, <https://doi.org/10.1029/2007GL032838>, 2008.
- 1065 Diffenbaugh, N. S. and Ashfaq, M.: Response of California Current forcing to mid-Holocene insolation and sea surface temperatures: WIND FORCING OF THE CALIFORNIA CURRENT, *Paleoceanography*, 22, n/a–n/a, <https://doi.org/10.1029/2006PA001382>, 2007.
- 1070 Diffenbaugh, N. S., Sloan, L. C., and Snyder, M. A.: Orbital suppression of wind-driven upwelling in the California Current at 6 ka, *Paleoceanography*, 18, <https://doi.org/10.1029/2002pa000865>, 2003.
- Dingemans, T., Mensing, S. A., Feakins, S. J., Kirby, M. E., and Zimmerman, S. R. H.: 3000 years of environmental change at Zaca Lake, California, USA, *Front. Ecol. Evol.*, 2, <https://doi.org/10.3389/fevo.2014.00034>, 2014.
- 1075 Du, X., Hendy, I., and Schimmelmarmann, A.: A 9000-year flood history for Southern California: A revised stratigraphy of varved sediments in Santa Barbara Basin, *Marine Geology*, 397, 29–42, <https://doi.org/10.1016/j.margeo.2017.11.014>, 2018.
- Edinborough, K., Porčić, M., Martindale, A., Brown, T. J., Supernant, K., and Ames, K. M.: Radiocarbon test for demographic events in written and oral history, *PNAS*, 114, 12436–12441, 2017.
- 1080 Ellis, E. C., Gauthier, N., Goldewijk, K. K., Bird, R. B., Boivin, N., Díaz, S., Fuller, D. Q., Gill, J. L., Kaplan, J. O., Kingston, N., Locke, H., McMichael, C. N. H., Ranco, D., Rick, T. C., Shaw, M. R., Stephens, L., Svenning, J.-C., and Watson, J. E. M.: People have shaped most of terrestrial nature for at least 12,000 years, *PNAS*, 118, <https://doi.org/10.1073/pnas.2023483118>, 2021.
- Erlandson, J. M., Graham, M. H., Bourque, B. J., Corbett, D., Estes, J. A., and Steneck, R. S.: The Kelp Highway Hypothesis: Marine Ecology, the Coastal Migration Theory, and the Peopling of the Americas, *The Journal of Island and Coastal Archaeology*, 2, 161–174, <https://doi.org/10.1080/15564890701628612>, 2007.
- 1085



- Erlandson, J. M., Rick, T. C., and Braje, T. J.: Fishing up the Food Web?: 12,000 Years of Maritime Subsistence and Adaptive Adjustments on California's Channel Islands, *Pacific Science*, 63, 711–724, <https://doi.org/10.2984/049.063.0411>, 2009.
- 1090 Estrella-Martínez, J., Ascough, P. L., Schöne, B. R., Scourse, J. D., and Butler, P. G.: 8.2 ka event North Sea hydrography determined by bivalve shell stable isotope geochemistry, 9, 6753, <https://doi.org/10.1038/s41598-019-43219-1>, 2019.
- Fard, E., Brown, L. N., Lydon, S., Smol, J. P., and MacDonald, G. M.: High-resolution sedimentological and geochemical records of three marshes in San Francisco Bay, California, *Quaternary International*, <https://doi.org/10.1016/j.quaint.2021.05.002>, 2021.
- 1095 Feakins, S. J., Kirby, M. E., Cheetham, M. I., Ibarra, Y., and Zimmerman, S. R. H.: Fluctuation in leaf wax D/H ratio from a southern California lake records significant variability in isotopes in precipitation during the late Holocene, *Organic Geochemistry*, 66, 48–59, <https://doi.org/10.1016/j.orggeochem.2013.10.015>, 2014.
- Field, D. B., Baumgartner, T. R., Charles, C. D., Ferreira-Bartrina, V., and Ohman, M. D.: Planktonic foraminifera of the California Current reflect 20th-century warming, 311, 63–66, <https://doi.org/10.1126/science.1116220>, 2006.
- 1100 Finnegan, S., Anderson, S. C., Harnik, P. G., Simpson, C., Tittensor, D. P., Byrnes, J. E., Finkel, Z. V., Lindberg, D. R., Liow, L. H., Lockwood, R., Lotze, H. K., McClain, C. R., McGuire, J. L., O'Dea, A., and Pandolfi, J. M.: Paleontological baselines for evaluating extinction risk in the modern oceans, 348, 567–570, <https://doi.org/10.1126/science.aaa6635>, 2015.
- 1105 Fisler, J. and Hendy, I. L.: California Current System response to late Holocene climate cooling in southern California, 35, <https://doi.org/Artn L09702> 10.1029/2008gl033902, 2008.
- Flores, C.: Importance of small-scale paleo-oceanographic conditions to interpret changes in size of California mussel (*Mytilus californianus*). Late Holocene, Santa Cruz island, California, *Quaternary International*, 427, 137–150, <https://doi.org/10.1016/j.quaint.2016.01.036>, 2017.
- 1110 Friddell, J. E., Thunell, R. C., Guilderson, T. P., and Kashgarian, M.: Increased northeast Pacific climatic variability during the warm middle Holocene, 30, 2003.
- Gardner, J. V., Heusser, L. E., Quintero, P. J., Stone, S. M., Barron, J. A., and Poore, R. Z.: Clear Lake record vs. the adjacent marine record; A correlation of their past 20,000 years of paleoclimatic and paleoceanographic responses, in: *Geological Society of America Special Papers*, vol. 214, Geological Society of America, 171–182, <https://doi.org/10.1130/SPE214-p171>, 1988.
- 1115 Gavin, D. G., Brubaker, L. B., and Lertzman, K. P.: HOLOCENE FIRE HISTORY OF A COASTAL TEMPERATE RAIN FOREST BASED ON SOIL CHARCOAL RADIOCARBON DATES, *Ecology*, 84, 186–201, [https://doi.org/10.1890/0012-9658\(2003\)084\[0186:HFHOAC\]2.0.CO;2](https://doi.org/10.1890/0012-9658(2003)084[0186:HFHOAC]2.0.CO;2), 2003.
- 1120 Gavin, D. G., Hallett, D. J., Hu, F. S., Lertzman, K. P., Prichard, S. J., Brown, K. J., Lynch, J. A., Bartlein, P., and Peterson, D. L.: Forest fire and climate change in western North America: insights from sediment charcoal records, *Frontiers in Ecology and the Environment*, 5, 499–506, <https://doi.org/10.1890/060161>, 2007.
- van Geen, A., Smethie, W. M., Horneman, A., and Lee, H.: Sensitivity of the North Pacific oxygen minimum zone to changes in ocean circulation: A simple model calibrated by chlorofluorocarbons, *J. Geophys. Res.*, 111, C10004, <https://doi.org/10.1029/2005JC003192>, 2006.
- 1125 Glassow, M. A., Thakar, H. B., and Kennett, D. J.: Red abalone collecting and marine water temperature during the Middle Holocene occupation of Santa Cruz Island, California, *Journal of Archaeological Science*, 39, 2574–2582, <https://doi.org/10.1016/j.jas.2012.03.017>, 2012.



- Graham, M. H., Kinlan, B. P., and Grosberg, R. K.: Post-glacial redistribution and shifts in productivity of giant kelp forests, <https://doi.org/10.1098/rspb.2009.1664>, 2010.
- 1130 Hallett, D. J. and Anderson, R. S.: Paleofire reconstruction for high-elevation forests in the Sierra Nevada, California, with implications for wildfire synchrony and climate variability in the late Holocene, *Quat. res.*, 73, 180–190, <https://doi.org/10.1016/j.yqres.2009.11.008>, 2010.
- Hallett, D. J., Lepofsky, D. S., Mathewes, R. W., and Lertzman, K. P.: 11 000 years of fire history and climate in the mountain hemlock rain forests of southwestern British Columbia based on sedimentary charcoal, *Can. J. For. Res.*, 33, 292–312, <https://doi.org/10.1139/x02-177>, 2003.
- 1135 Hermann, N. W., Oster, J. L., and Ibarra, D. E.: Spatial patterns and driving mechanisms of mid-Holocene hydroclimate in western North America: MID-HOLOCENE HYDROCLIMATE IN WESTERN NORTH AMERICA, *J. Quaternary Sci.*, 33, 421–434, <https://doi.org/10.1002/jqs.3023>, 2018.
- Heusser, L.: Direct correlation of millennial-scale changes in western North American vegetation and climate with changes in the California Current System over the past ~60 kyr, *Paleoceanography*, 13, 252–262, <https://doi.org/10.1029/98PA00670>, 1998.
- Heusser, L. E.: Pollen in Santa Barbara Basin, California: A 12,000 year record, 89, 673–678, 1978.
- Heusser, L. E.: Palynology and paleoecology of postglacial sediments in an anoxic basin, Saanich Inlet, British Columbia, 13, 1983.
- 1145 Hickey, B. M.: The California current system—hypotheses and facts, *Progress in Oceanography*, 8, 191–279, [https://doi.org/10.1016/0079-6611\(79\)90002-8](https://doi.org/10.1016/0079-6611(79)90002-8), 1979.
- Higuera, P. E., Shuman, B. N., and Wolf, K. D.: Rocky Mountain subalpine forests now burning more than any time in recent millennia, *PNAS*, 118, <https://doi.org/10.1073/pnas.2103135118>, 2021.
- 1150 Hiner, C. A., Kirby, M. E., Bonuso, N., Patterson, W. P., Palermo, J., and Silveira, E.: Late Holocene hydroclimatic variability linked to Pacific forcing: evidence from Abbott Lake, coastal central California, *J Paleolimnol*, 56, 299–313, <https://doi.org/10.1007/s10933-016-9912-4>, 2016.
- Ingram, B. L.: Differences in Radiocarbon Age between Shell and Charcoal from a Holocene Shellmound in Northern California, *Quat. res.*, 49, 102–110, <https://doi.org/10.1006/qres.1997.1944>, 1998.
- 1155 Jones, T. L. and Kennett, D. J.: Late Holocene Sea Temperatures along the Central California Coast, *Quat. res.*, 51, 74–82, <https://doi.org/10.1006/qres.1998.2000>, 1999.
- Jones, T. L., Kennett, D. J., Kennett, J. P., and Coddling, B. F.: Seasonal stability in Late Holocene shellfish harvesting on the central California coast, *Journal of Archaeological Science*, 35, 2286–2294, <https://doi.org/10.1016/j.jas.2008.03.002>, 2008.
- 1160 Kaufman, D., McKay, N., Routson, C., Erb, M., Davis, B., Heiri, O., Jaccard, S., Tierney, J., Dätwyler, C., Axford, Y., Brussel, T., Cartapanis, O., Chase, B., Dawson, A., de Vernal, A., Engels, S., Jonkers, L., Marsicek, J., Moffa-Sánchez, P., Morrill, C., Orsi, A., Rehfeld, K., Saunders, K., Sommer, P. S., Thomas, E., Tonello, M., Tóth, M., Vachula, R., Andreev, A., Bertrand, S., Biskaborn, B., Bringué, M., Brooks, S., Caniupán, M., Chevalier, M., Cwynar, L., Emile-Geay, J., Fegyveresi, J., Feurdean, A., Finsinger, W., Fortin, M.-C., Foster, L., Fox, M., Gajewski, K., Grosjean, M., Hausmann, S., Heinrichs, M., Holmes, N., Ilyashuk, B., Ilyashuk, E., Juggins, S., Khider, D., Koinig, K., Langdon, P., Larocque-Tobler, I., Li, J., Lotter, A., Luoto, T., Mackay, A., Magyari, E., Malevich, S., Mark, B., Massafiero, J., Montade, V., Nazarova, L., Novenko, E., Pařil, P., Pearson, E., Peros, M., Pienitz, R., Plóciennik, M., Porinchu, D., Potito, A., Rees, A., Reinemann, S., Roberts, S., Rolland, N., Salonen, S., Self, A., Seppä, H., Shala, S., St-Jacques, J.-M., Stenni, B., Syrykh, L., Tarrats, P., Taylor, K., van den Bos, V., Velle, G., Wahl, E., Walker, I., Wilmshurst,





- 1170 J., Zhang, E., and Zhilich, S.: A global database of Holocene paleotemperature records, *Sci Data*, 7, 115, <https://doi.org/10.1038/s41597-020-0445-3>, 2020.
- Kaufman, D. S., Axford, Y. L., Henderson, A. C. G., McKay, N. P., Oswald, W. W., Saenger, C., Anderson, R. S., Bailey, H. L., Clegg, B., Gajewski, K., Hu, F. S., Jones, M. C., Massa, C., Routson, C. C., Werner, A., Wooller, M. J., and Yu, Z.: Holocene climate changes in eastern Beringia (NW North America) – A systematic review of multi-proxy evidence, *Quaternary Science Reviews*, 147, 312–339, <https://doi.org/10.1016/j.quascirev.2015.10.021>, 2016.
- 1175 Kennett, D. J. and Kennett, J. P.: Competitive and cooperative responses to climatic instability in coastal southern California, *Am Antiquity*, 65, 379–395, <https://doi.org/Doi.10.2307/2694065>, 2000.
- Kennett, D. J., Kennett, J. P., Erlandson, J. M., and Cannariato, K. G.: Human responses to Middle Holocene climate change on California’s Channel Islands, *Quaternary Sci Rev*, 26, 351–367, <https://doi.org/10.1016/j.quascirev.2006.07.019>, 2007.
- 1180 Kennett, J. P. and Ingram, B. L.: A 20,000 Year Record of Ocean Circulation and Climate-Change from the Santa-Barbara Basin, *Nature*, 377, 510–514, <https://doi.org/DOI.10.1038/377510a0>, 1995.
- Kim, J.-H., Rimbu, N., Lorenz, S. J., Lohmann, G., Nam, S.-I., Schouten, S., Rühlemann, C., and Schneider, R. R.: North Pacific and North Atlantic sea-surface temperature variability during the Holocene, *Quaternary Science Reviews*, 23, 2141–2154, <https://doi.org/10.1016/j.quascirev.2004.08.010>, 2004.
- 1185 Kirby, M. E., Lund, S. P., Anderson, M. A., and Bird, B. W.: Insolation forcing of Holocene climate change in Southern California: a sediment study from Lake Elsinore, *J Paleolimnol*, 38, 395–417, <https://doi.org/10.1007/s10933-006-9085-7>, 2007.
- 1190 Kirby, M. E., Lund, S. P., Patterson, W. P., Anderson, M. A., Bird, B. W., Ivanovici, L., Monarrez, P., and Nielsen, S.: A Holocene record of Pacific Decadal Oscillation (PDO)-related hydrologic variability in Southern California (Lake Elsinore, CA), *J Paleolimnol*, 44, 819–839, <https://doi.org/10.1007/s10933-010-9454-0>, 2010.
- Kirby, M. E., Zimmerman, S. R. H., Patterson, W. P., and Rivera, J. J.: A 9170-year record of decadal-to-multi-centennial scale pluvial episodes from the coastal Southwest United States: a role for atmospheric rivers?, *Quaternary Science Reviews*, 46, 57–65, <https://doi.org/10.1016/j.quascirev.2012.05.008>, 2012.
- 1195 Kirby, M. E., Feakins, S. J., Hiner, C. A., Fantozzi, J., Zimmerman, S. R. H., Dingemans, T., and Mensing, S. A.: Tropical Pacific forcing of Late-Holocene hydrologic variability in the coastal southwest United States, *Quaternary Science Reviews*, 102, 27–38, <https://doi.org/10.1016/j.quascirev.2014.08.005>, 2014.
- 1200 Kirby, M. E., Knell, E. J., Anderson, W. T., Lachniet, M. S., Palermo, J., Eeg, H., Lucero, R., Murrieta, R., Arevalo, A., Silveira, E., and Hiner, C. A.: Evidence for insolation and Pacific forcing of late glacial through Holocene climate in the Central Mojave Desert (Silver Lake, CA), *Quat. res.*, 84, 174–186, <https://doi.org/10.1016/j.yqres.2015.07.003>, 2015.
- Kirby, M. E. C., Patterson, W. P., Lachniet, M., Noblet, J. A., Anderson, M. A., Nichols, K., and Avila, J.: Pacific Southwest United States Holocene Droughts and Pluvials Inferred From Sediment  $\delta^{18}\text{O}(\text{calcite})$  and Grain Size Data (Lake Elsinore, California), *Front. Earth Sci.*, 7, <https://doi.org/10.3389/feart.2019.00074>, 2019.
- 1205 Klimaszewski-Patterson, A., Morgan, C. T., and Mensing, S.: Identifying a Pre-Columbian Anthropocene in California, *Annals of the American Association of Geographers*, 111, 784–794, <https://doi.org/10.1080/24694452.2020.1846488>, 2021.



- 1210 Konrad, S. K. and Clark, D. H.: Evidence for an Early Neoglacial Glacier Advance from Rock Glaciers and Lake Sediments in the Sierra Nevada, California, U.S.A., 30, 272–284, <https://doi.org/10.1080/00040851.1998.12002901>, 1998.
- LaDochy, S., Medina, R., and Patzert, W.: Recent California climate variability: spatial and temporal patterns in temperature trends, *Clim. Res.*, 33, 159–169, <https://doi.org/10.3354/cr033159>, 2007.
- 1215 Lightfoot, K. G. and Cuthrell, R. Q.: Anthropogenic burning and the Anthropocene in late-Holocene California, *The Holocene*, 25, 1581–1587, <https://doi.org/10.1177/0959683615588376>, 2015.
- Lindstrom, S.: Submerged Tree Stumps as Indicators of Mid-Holocene Aridity in the Lake Tahoe Basin, 13, 1990.
- Liu, Z., Zhu, J., Rosenthal, Y., Zhang, X., Otto-Bliesner, B. L., Timmermann, A., Smith, R. S., Lohmann, G., Zheng, W., and Timm, O. E.: The Holocene temperature conundrum, *PNAS*, 111, E3501–E3505, <https://doi.org/10.1073/pnas.1407229111>, 2014.
- 1220 Lluch-Cota, D. B., Wooster, W. S., and Hare, S. R.: Sea surface temperature variability in coastal areas of the northeastern Pacific related to the El Niño–Southern Oscillation and the Pacific Decadal Oscillation, *Geophys. Res. Lett.*, 28, 2029–2032, <https://doi.org/10.1029/2000GL012429>, 2001.
- Long, C. J., Whitlock, C., Bartlein, P. J., and Millsaugh, S. H.: A 9000-year fire history from the Oregon Coast Range, based on a high-resolution charcoal study, <https://doi.org/10.1139/x98-051>, 2011.
- 1225 Lyle, M., Heusser, L., Ravelo, C., Yamamoto, M., Barron, J., Diffenbaugh, N. S., Herbert, T., and Andreasen, D.: Out of the Tropics: The Pacific, Great Basin Lakes, and Late Pleistocene Water Cycle in the Western United States, *Science*, 337, 1629–1633, <https://doi.org/10.1126/science.1218390>, 2012.
- MacDonald, G. M. and Case, R. A.: Variations in the Pacific Decadal Oscillation over the past millennium, 32, <https://doi.org/Artn L08703> 10.1029/2005gl022478, 2005.
- 1230 MacDonald, G. M., Moser, K. A., Bloom, A. M., Potito, A. P., Porinchu, D. F., Holmquist, J. R., Hughes, J., and Kremenetski, K. V.: Prolonged California aridity linked to climate warming and Pacific sea surface temperature, *Sci Rep*, 6, 33325, <https://doi.org/10.1038/srep33325>, 2016.
- Malamud-Roam, F. P., Lynn Ingram, B., Hughes, M., and Florsheim, J. L.: Holocene paleoclimate records from a large California estuarine system and its watershed region: linking watershed climate and bay conditions, *Quaternary Science Reviews*, 25, 1570–1598, <https://doi.org/10.1016/j.quascirev.2005.11.012>, 2006.
- 1235 Mann, M. E. and Gleick, P. H.: Climate change and California drought in the 21st century, *PNAS*, 112, 3858–3859, <https://doi.org/10.1073/pnas.1503667112>, 2015.
- Mantua, N. J., Munn, T., Wiley, J., and Mantua, N. J.: Pacific–Decadal Oscillation, 2002.
- 1240 Marcott, S. A., Shakun, J. D., Clark, P. U., and Mix, A. C.: A Reconstruction of Regional and Global Temperature for the Past 11,300 Years, 339, 1198–1201, <https://doi.org/10.1126/science.1228026>, 2013.
- Marlon, J., Bartlein, P. J., and Whitlock, C.: Fire-fuel-climate linkages in the northwestern USA during the Holocene, *The Holocene*, 16, 1059–1071, <https://doi.org/10.1177/0959683606069396>, 2006.
- 1245 Marlon, J. R., Bartlein, P. J., Gavin, D. G., Long, C. J., Anderson, R. S., Briles, C. E., Brown, K. J., Colombaroli, D., Hallett, D. J., Power, M. J., Scharf, E. A., and Walsh, M. K.: Long-term perspective on wildfires in the western USA, *PNAS*, 109, E535–E543, <https://doi.org/10.1073/pnas.1112839109>, 2012.



- Marlon, J. R., Bartlein, P. J., Danianu, A.-L., Harrison, S. P., Maezumi, S. Y., Power, M. J., Tinner, W., and Vanni re, B.: Global biomass burning: a synthesis and review of Holocene paleofire records and their controls, *Quaternary Science Reviews*, 65, 5–25, <https://doi.org/10.1016/j.quascirev.2012.11.029>, 2013.
- 1250 Marsicek, J., Shuman, B. N., Bartlein, P. J., Shafer, S. L., and Brewer, S.: Reconciling divergent trends and millennial variations in Holocene temperatures, 554, 92–96, <https://doi.org/10.1038/nature25464>, 2018.
- Matero, I. S. O., Gregoire, L. J., Ivanovic, R. F., Tindall, J. C., and Haywood, A. M.: The 8.2 ka cooling event caused by Laurentide ice saddle collapse, *Earth and Planetary Science Letters*, 473, 205–214, <https://doi.org/10.1016/j.epsl.2017.06.011>, 2017.
- 1255 Mayewski, P. A., Rohling, E. E., Curt Stager, J., Karl n, W., Maasch, K. A., Meeker, L. D., Meyerson, E. A., Gasse, F., van Kreveld, S., Holmgren, K., Lee-Thorp, J., Rosqvist, G., Rack, F., Staubwasser, M., Schneider, R. R., and Steig, E. J.: Holocene climate variability, *Quat. res.*, 62, 243–255, <https://doi.org/10.1016/j.yqres.2004.07.001>, 2004.
- 1260 McGann, M.: High-Resolution Foraminiferal, Isotopic, and Trace Element Records from Holocene Estuarine Deposits of San Francisco Bay, California, *Journal of Coastal Research*, 245, 1092–1109, <https://doi.org/10.2112/08A-0003.1>, 2008.
- McGann, M.: Paleooceanographic changes on the Farallon Escarpment off central California during the last 16,000 years, *Quatern Int*, 235, 26–39, <https://doi.org/10.1016/j.quaint.2010.09.005>, 2011.
- 1265 McGann, M.: Correlation of marine and coastal terrestrial records of central California: Response to paleoceanographic and paleoclimatic change during the past 19,000 years, *Quatern Int*, 387, 58–71, <https://doi.org/10.1016/j.quaint.2015.01.037>, 2015.
- McKechnie, I.: Indigenous Oral History and Settlement Archaeology in Barkley Sound, Western Vancouver Island, 36, 2015.
- 1270 McQuoid, M. R. and Hobson, L. A.: A Holocene record of diatom and silico agellate microfossils in sediments of Saanich Inlet, ODP Leg 169S, 13, 2001.
- Metcalfe, S. E.: The Holocene history of the North American Monsoon: ‘known knowns’ and ‘known unknowns’ in understanding its spatial and temporal complexity, 27, 2015.
- Minnis, P. E.: People and plants in ancient western North America, University of Arizona Press, 492 pp., n.d.
- 1275 Mix, A. C., Lund, D. C., Pisias, N. G., Bod n, P., Bornmalm, L., Lyle, M., and Pike, J.: Rapid climate oscillations in the Northeast Pacific during the last deglaciation reflect Northern and Southern Hemisphere sources, in: *Geophysical Monograph Series*, vol. 112, edited by: Clark, U., Webb, S., and Keigwin, D., American Geophysical Union, Washington, D. C., 127–148, <https://doi.org/10.1029/GM112p0127>, 1999.
- Moffitt, S. E., Hill, T. M., Ohkushi, K., Kennett, J. P., and Behl, R. J.: Vertical oxygen minimum zone oscillations since 20 ka in Santa Barbara Basin: A benthic foraminiferal community perspective, *Paleoceanography*, 29, 44–57, <https://doi.org/10.1002/2013pa002483>, 2014.
- 1280 Moffitt, S. E., Hill, T. M., Roopnarine, P. D., and Kennett, J. P.: Response of seafloor ecosystems to abrupt global climate change, *P Natl Acad Sci USA*, 112, 4684–4689, <https://doi.org/10.1073/pnas.1417130112>, 2015.
- Mohr, J. A., Whitlock, C., and Skinner, C. N.: Postglacial vegetation and fire history, eastern Klamath Mountains, California, USA, *The Holocene*, 10, 587–601, <https://doi.org/10.1191/095968300675837671>, 2000.



- 1285 Nederbragt, A. J. and Thurow, J. W.: A 6000 yr varve record of Holocene climate in Saanich Inlet, British Columbia, from digital sediment colour analysis of ODP Leg 169S cores, *Marine Geology*, 174, 95–110, [https://doi.org/10.1016/S0025-3227\(00\)00144-4](https://doi.org/10.1016/S0025-3227(00)00144-4), 2001.
- 1290 Negrini, R. M., Wigand, P. E., Draucker, S., Gobalet, K., Gardner, J. K., Sutton, M. Q., and Yohe, R. M.: The Rambla highstand shoreline and the Holocene lake-level history of Tulare Lake, California, USA, *Quaternary Science Reviews*, 25, 1599–1618, <https://doi.org/10.1016/j.quascirev.2005.11.014>, 2006.
- Ohkushi, K., Kennett, J. P., Zeleski, C. M., Moffitt, S. E., Hill, T. M., Robert, C., Beaufort, L., and Behl, R. J.: Quantified intermediate water oxygenation history of the NE Pacific: A new benthic foraminiferal record from Santa Barbara basin, *Paleoceanography*, 28, 453–467, <https://doi.org/10.1002/palo.20043>, 2013.
- 1295 Osborne, E. B., Thunell, R. C., Gruber, N., Feely, R. A., and Benitez-Nelson, C. R.: Decadal variability in twentieth-century ocean acidification in the California Current Ecosystem, *Nat. Geosci.*, 13, 43–49, <https://doi.org/10.1038/s41561-019-0499-z>, 2020.
- Oster, J. L., Sharp, W. D., Covey, A. K., Gibson, J., Rogers, B., and Mix, H.: Climate response to the 8.2 ka event in coastal California, *Sci Rep*, 7, 3886, <https://doi.org/10.1038/s41598-017-04215-5>, 2017.
- 1300 Pak, D. K., Hendy, I. L., Weaver, J. C., Schimmelmann, A., and Clayman, L.: Foraminiferal proxy response to ocean temperature variability and acidification over the last 150 years in the Santa Barbara Basin (California), *Quatern Int*, <https://doi.org/10.1016/j.quaint.2016.07.049>, 2016.
- Palmer, H. M., Hill, T. M., Roopnarine, P. D., Myhre, S. E., Reyes, K. R., and Donnenfield, J. T.: Southern California margin benthic foraminiferal assemblages record recent centennial-scale changes in oxygen minimum zone, 17, 2923–2937, <https://doi.org/10.5194/bg-17-2923-2020>, 2020.
- 1305 Pante, E. and Simon-Bouhet, B.: marmap: A Package for Importing, Plotting and Analyzing Bathymetric and Topographic Data in R, *PLOS ONE*, 8, e73051, <https://doi.org/10.1371/journal.pone.0073051>, 2013.
- Pellatt, M. G., Hebda, R. J., and Mathewes, R. W.: High-resolution Holocene vegetation history and climate from Hole 1034B, ODP leg 169S, Saanich Inlet, Canada, *Marine Geology*, 174, 211–226, [https://doi.org/10.1016/S0025-3227\(00\)00151-1](https://doi.org/10.1016/S0025-3227(00)00151-1), 2001.
- 1310 Platzman, E. and Lund, S.: High-resolution environmental magnetic study of a Holocene sedimentary record from Zaca Lake, California, *The Holocene*, 29, 17–25, <https://doi.org/10.1177/0959683618804636>, 2019.
- Praetorius, S. K., Condrón, A., Mix, A. C., Walczak, M. H., McKay, J. L., and Du, J.: The role of Northeast Pacific meltwater events in deglacial climate change, 6, eaay2915, <https://doi.org/10.1126/sciadv.aay2915>, 2020.
- 1315 Rasmussen, J. B. T., Polyak, V. J., and Asmerom, Y.: Evidence for Pacific-modulated precipitation variability during the late Holocene from the southwestern USA, *Geophys. Res. Lett.*, 33, L08701, <https://doi.org/10.1029/2006GL025714>, 2006.
- Renssen, H., Seppä, H., Crosta, X., Goosse, H., and Roche, D. M.: Global characterization of the Holocene Thermal Maximum, *Quaternary Science Reviews*, 48, 7–19, <https://doi.org/10.1016/j.quascirev.2012.05.022>, 2012.
- 1320 Reyes, A. V. and Clague, J. J.: Stratigraphic evidence for multiple Holocene advances of Lillooet Glacier, southern Coast Mountains, British Columbia, *Canadian Journal of Earth Sciences*, 41, 903–918, <https://doi.org/10.1139/e04-039>, 2004.
- Rick, T. C.: Weathering the storm: Coastal subsistence and ecological resilience on Late Holocene Santa Rosa Island, California, *Quaternary International*, 239, 135–146, <https://doi.org/10.1016/j.quaint.2010.06.008>, 2011.



- 1325 Roark, E. B., Ingram, B. L., Southon, J., and Kennett, J. P.: Holocene foraminiferal radiocarbon record of paleocirculation in the Santa Barbara Basin, *Geology*, 31, 379–382, [https://doi.org/Doi.10.1130/0091-7613\(2003\)031<0379:Hfrop>2.0.Co;2](https://doi.org/Doi.10.1130/0091-7613(2003)031<0379:Hfrop>2.0.Co;2), 2003.
- 1330 Schimmelmann, A., Hendy, I. L., Dunn, L., Pak, D. K., and Lange, C. B.: Revised similar to 2000-year chronostratigraphy of partially varved marine sediment in Santa Barbara Basin, California, *Gff*, 135, 258–264, <https://doi.org/10.1080/11035897.2013.773066>, 2013.
- Sheppard, P. R., Comrie, A. C., Packin, G. D., Angersbach, K., and Hughes, M. K.: The climate of the US Southwest, 21, 219–238, <https://doi.org/10.3354/cr021219>, 2002.
- 1335 Shuman, B. N., Routson, C., McKay, N., Fritz, S., Kaufman, D., Kirby, M. E., Nolan, C., Pederson, G. T., and St-Jacques, J.-M.: Placing the Common Era in a Holocene context: millennial to centennial patterns and trends in the hydroclimate of North America over the past 2000 years, *Clim. Past*, 14, 665–686, <https://doi.org/10.5194/cp-14-665-2018>, 2018.
- Siedlecki, S. A., Banas, N. S., Davis, K. A., Giddings, S., Hickey, B. M., MacCready, P., Connolly, T., and Geier, S.: Seasonal and interannual oxygen variability on the Washington and Oregon continental shelves, 120, 608–633, <https://doi.org/10.1002/2014JC010254>, 2015.
- 1340 Spaulding, W. G.: A Middle Holocene Vegetation Record from the Mojave Desert of North America and its Paleoclimatic Significance, *Quat. res.*, 35, 427–437, [https://doi.org/10.1016/0033-5894\(91\)90055-A](https://doi.org/10.1016/0033-5894(91)90055-A), 1991.
- 1345 Steinman, B. A., Pompeani, D. P., Abbott, M. B., Ortiz, J. D., Stansell, N. D., Finkenbinder, M. S., Mihindukulasooriya, L. N., and Hillman, A. L.: Oxygen isotope records of Holocene climate variability in the Pacific Northwest, *Quaternary Science Reviews*, 142, 40–60, <https://doi.org/10.1016/j.quascirev.2016.04.012>, 2016.
- Steinman, B. A., Nelson, D. B., Abbott, M. B., Stansell, N. D., Finkenbinder, M. S., and Finney, B. P.: Lake sediment records of Holocene hydroclimate and impacts of the Mount Mazama eruption, north-central Washington, USA, *Quaternary Science Reviews*, 204, 17–36, <https://doi.org/10.1016/j.quascirev.2018.09.018>, 2019.
- 1350 Stine, S.: Late holocene fluctuations of Mono Lake, eastern California, *Palaeogeography, Palaeoclimatology, Palaeoecology*, 78, 333–381, [https://doi.org/10.1016/0031-0182\(90\)90221-R](https://doi.org/10.1016/0031-0182(90)90221-R), 1990.
- Stine, S.: Extreme and persistent drought in California and Patagonia during mediaeval time, 369, 546–549, <https://doi.org/10.1038/369546a0>, 1994.
- 1355 Taylor, A. H., Trouet, V., Skinner, C. N., and Stephens, S.: Socioecological transitions trigger fire regime shifts and modulate fire–climate interactions in the Sierra Nevada, USA, 1600–2015 CE, *Proc Natl Acad Sci USA*, 113, 13684–13689, <https://doi.org/10.1073/pnas.1609775113>, 2016.
- Thomas, E. R., Wolff, E. W., Mulvaney, R., Steffensen, J. P., Johnsen, S. J., Arrowsmith, C., White, J. W. C., Vaughn, B., and Popp, T.: The 8.2ka event from Greenland ice cores, *Quaternary Science Reviews*, 26, 70–81, <https://doi.org/10.1016/j.quascirev.2006.07.017>, 2007.
- 1360 Tomasovych, A. and Kidwell, S. M.: Nineteenth-century collapse of a benthic marine ecosystem on the open continental shelf, *P Roy Soc B-Biol Sci*, 284, <https://doi.org/ARTN.20170328> 10.1098/rspb.2017.0328, 2017.
- Viau, A. E., Gajewski, K., Sawada, M. C., and Fines, P.: Millennial-scale temperature variations in North America during the Holocene, *J. Geophys. Res.*, 111, D09102, <https://doi.org/10.1029/2005JD006031>, 2006.



- 1365 Voarintsoa, N. R. G., Matero, I. S. O., Railsback, L. B., Gregoire, L. J., Tindall, J., Sime, L., Cheng, H., Edwards, R. L., Brook, G. A., Kathayat, G., Li, X., Michel Rakotondrazafy, A. F., and Madison Razanatsheho, M. O.: Investigating the 8.2 ka event in northwestern Madagascar: Insight from data–model comparisons, *Quaternary Science Reviews*, 204, 172–186, <https://doi.org/10.1016/j.quascirev.2018.11.030>, 2019.
- 1370 Waelbroeck, C., Paul, A., Kucera, M., Rosell-Melé, A., Weinelt, M., Schneider, R., Mix, A. C., Abelmann, A., Armand, L., Bard, E., Barker, S., Barrows, T. T., Benway, H., Cacho, I., Chen, M.-T., Cortijo, E., Crosta, X., de Vernal, A., Dokken, T., Duprat, J., Elderfield, H., Eynaud, F., Gersonde, R., Hayes, A., Henry, M., Hillaire-Marcel, C., Huang, C.-C., Jansen, E., Juggins, S., Kallel, N., Kiefer, T., Kienast, M., Labeyrie, L., Leclaire, H., Londeix, L., Mangin, S., Matthiessen, J., Marret, F., Meland, M., Morey, A. E., Mulitza, S., Pflaumann, U., Pisias, N. G., Radi, T., Rochon, A., Rohling, E. J., Saffi, L., Schäfer-Neth, C., Solignac, S., Spero, H., Tachikawa, K., Turon, J.-L., and MARGO Project Members: Constraints on the magnitude and patterns of ocean cooling at the Last Glacial Maximum, *Nature Geosci*, 2, 127–132, <https://doi.org/10.1038/ngeo411>, 2009.
- 1375 Walczak, M. H., Mix, A. C., Cowan, E. A., Fallon, S., Fifield, L. K., Alder, J. R., Du, J., Haley, B., Hoborn, T., Padman, J., Praetorius, S. K., Schmittner, A., Stoner, J. S., and Zellers, S. D.: Phasing of millennial-scale climate variability in the Pacific and Atlantic Oceans, <https://doi.org/10.1126/science.aba7096>, 2020.
- Walker, M., Head, M. J., Berkelhammer, M., Björck, S., Cheng, H., Cwynar, L., Fisher, D., Gkinis, V., Long, A., Lowe, J., Newnham, R., Rasmussen, S. O., and Weiss, H.: Formal ratification of the subdivision of the Holocene Series/Epoch (Quaternary System/Period): two new Global Boundary Stratotype Sections and Points (GSSPs) and three new stages/subseries, *Episodes*, 41, 213–223, <https://doi.org/10.18814/epiiugs/2018/018016>, 2018.
- 1385 Walsh, M. K., Lukens, M. L., McCutcheon, P. T., and Burtchard, G. C.: Fire-climate-human interactions during the postglacial period at Sunrise Ridge, Mount Rainier National Park, Washington (USA), *Quaternary Science Reviews*, 177, 246–264, <https://doi.org/10.1016/j.quascirev.2017.10.032>, 2017.
- 1390 Wang, Y., Hendy, I., and Napier, T. J.: Climate and Anthropogenic Controls of Coastal Deoxygenation on Interannual to Centennial Timescales, 2017.
- Wang, Y., Hendy, I. L., and Zhu, J.: Expansion of the Southern California oxygen minimum zone during the early-to mid-Holocene due to reduced ventilation of the Northeast Pacific, *Quaternary Science Reviews*, 238, 106326, <https://doi.org/10.1016/j.quascirev.2020.106326>, 2020.
- 1395 Wanner, H., Beer, J., Bütikofer, J., Crowley, T. J., Cubasch, U., Flückiger, J., Goosse, H., Grosjean, M., Joos, F., Kaplan, J. O., Küttel, M., Müller, S. A., Prentice, I. C., Solomina, O., Stocker, T. F., Tarasov, P., Wagner, M., and Widmann, M.: Mid- to Late Holocene climate change: an overview, *Quaternary Science Reviews*, 27, 1791–1828, <https://doi.org/10.1016/j.quascirev.2008.06.013>, 2008.
- 1400 Waters, C. N., Zalasiewicz, J., Summerhayes, C., Barnosky, A. D., Poirier, C., Galuszka, A., Cearreta, A., Edgeworth, M., Ellis, E. C., Ellis, M., Jeandel, C., Leinfelder, R., McNeill, J. R., Richter, D., Steffen, W., Syvitski, J., Vidas, D., Wapreigh, M., Williams, M., Zhisheng, A., Grinevald, J., Odada, E., Oreskes, N., and Wolfe, A. P.: The Anthropocene is functionally and stratigraphically distinct from the Holocene, 351, aad2622, <https://doi.org/10.1126/science.aad2622>, 2016.
- Westerling, A. L., Gershunov, A., Brown, T. J., Cayan, D. R., and Dettinger, M. D.: Climate and Wildfire in the Western United States, 84, 595–604, <https://doi.org/10.1175/BAMS-84-5-595>, 2003.
- 1405 Westerling, A. L., Bryant, B. P., Preisler, H. K., Holmes, T. P., Hidalgo, H. G., Das, T., and Shrestha, S. R.: Climate change and growth scenarios for California wildfire, *Climatic Change*, 109, 445–463, <https://doi.org/10.1007/s10584-011-0329-9>, 2011.



- 1410 Whitlock, C., Marlon, J., Briles, C., Brunelle, A., Long, C., and Bartlein, P.: Long-term relations among fire, fuel, and climate in the north-western US based on lake-sediment studies, *Int. J. Wildland Fire*, 17, 72, <https://doi.org/10.1071/WF07025>, 2008.
- Wise, E. K.: Five centuries of U.S. West Coast drought: Occurrence, spatial distribution, and associated atmospheric circulation patterns, 43, 4539–4546, <https://doi.org/10.1002/2016GL068487>, 2016.
- 1415 Yati, E., Minobe, S., Mantua, N., Ito, S., and Di Lorenzo, E.: Marine Ecosystem Variations Over the North Pacific and Their Linkage to Large-Scale Climate Variability and Change, *Front. Mar. Sci.*, 7, <https://doi.org/10.3389/fmars.2020.578165>, 2020.
